# Supplementary material for: Optimizing Deep Learning Models for Ovarian Cancer Subtype Classification: A Systematic Evaluation of Architectures and Data Augmentation Strategies
Source: Research Square preprint supplement (doi:10.21203/rs.3.rs-6216837/v1), 2025-05-07
Supplement: Supplementary file 1 [file 459aaeb74578e7a323c91075.docx]

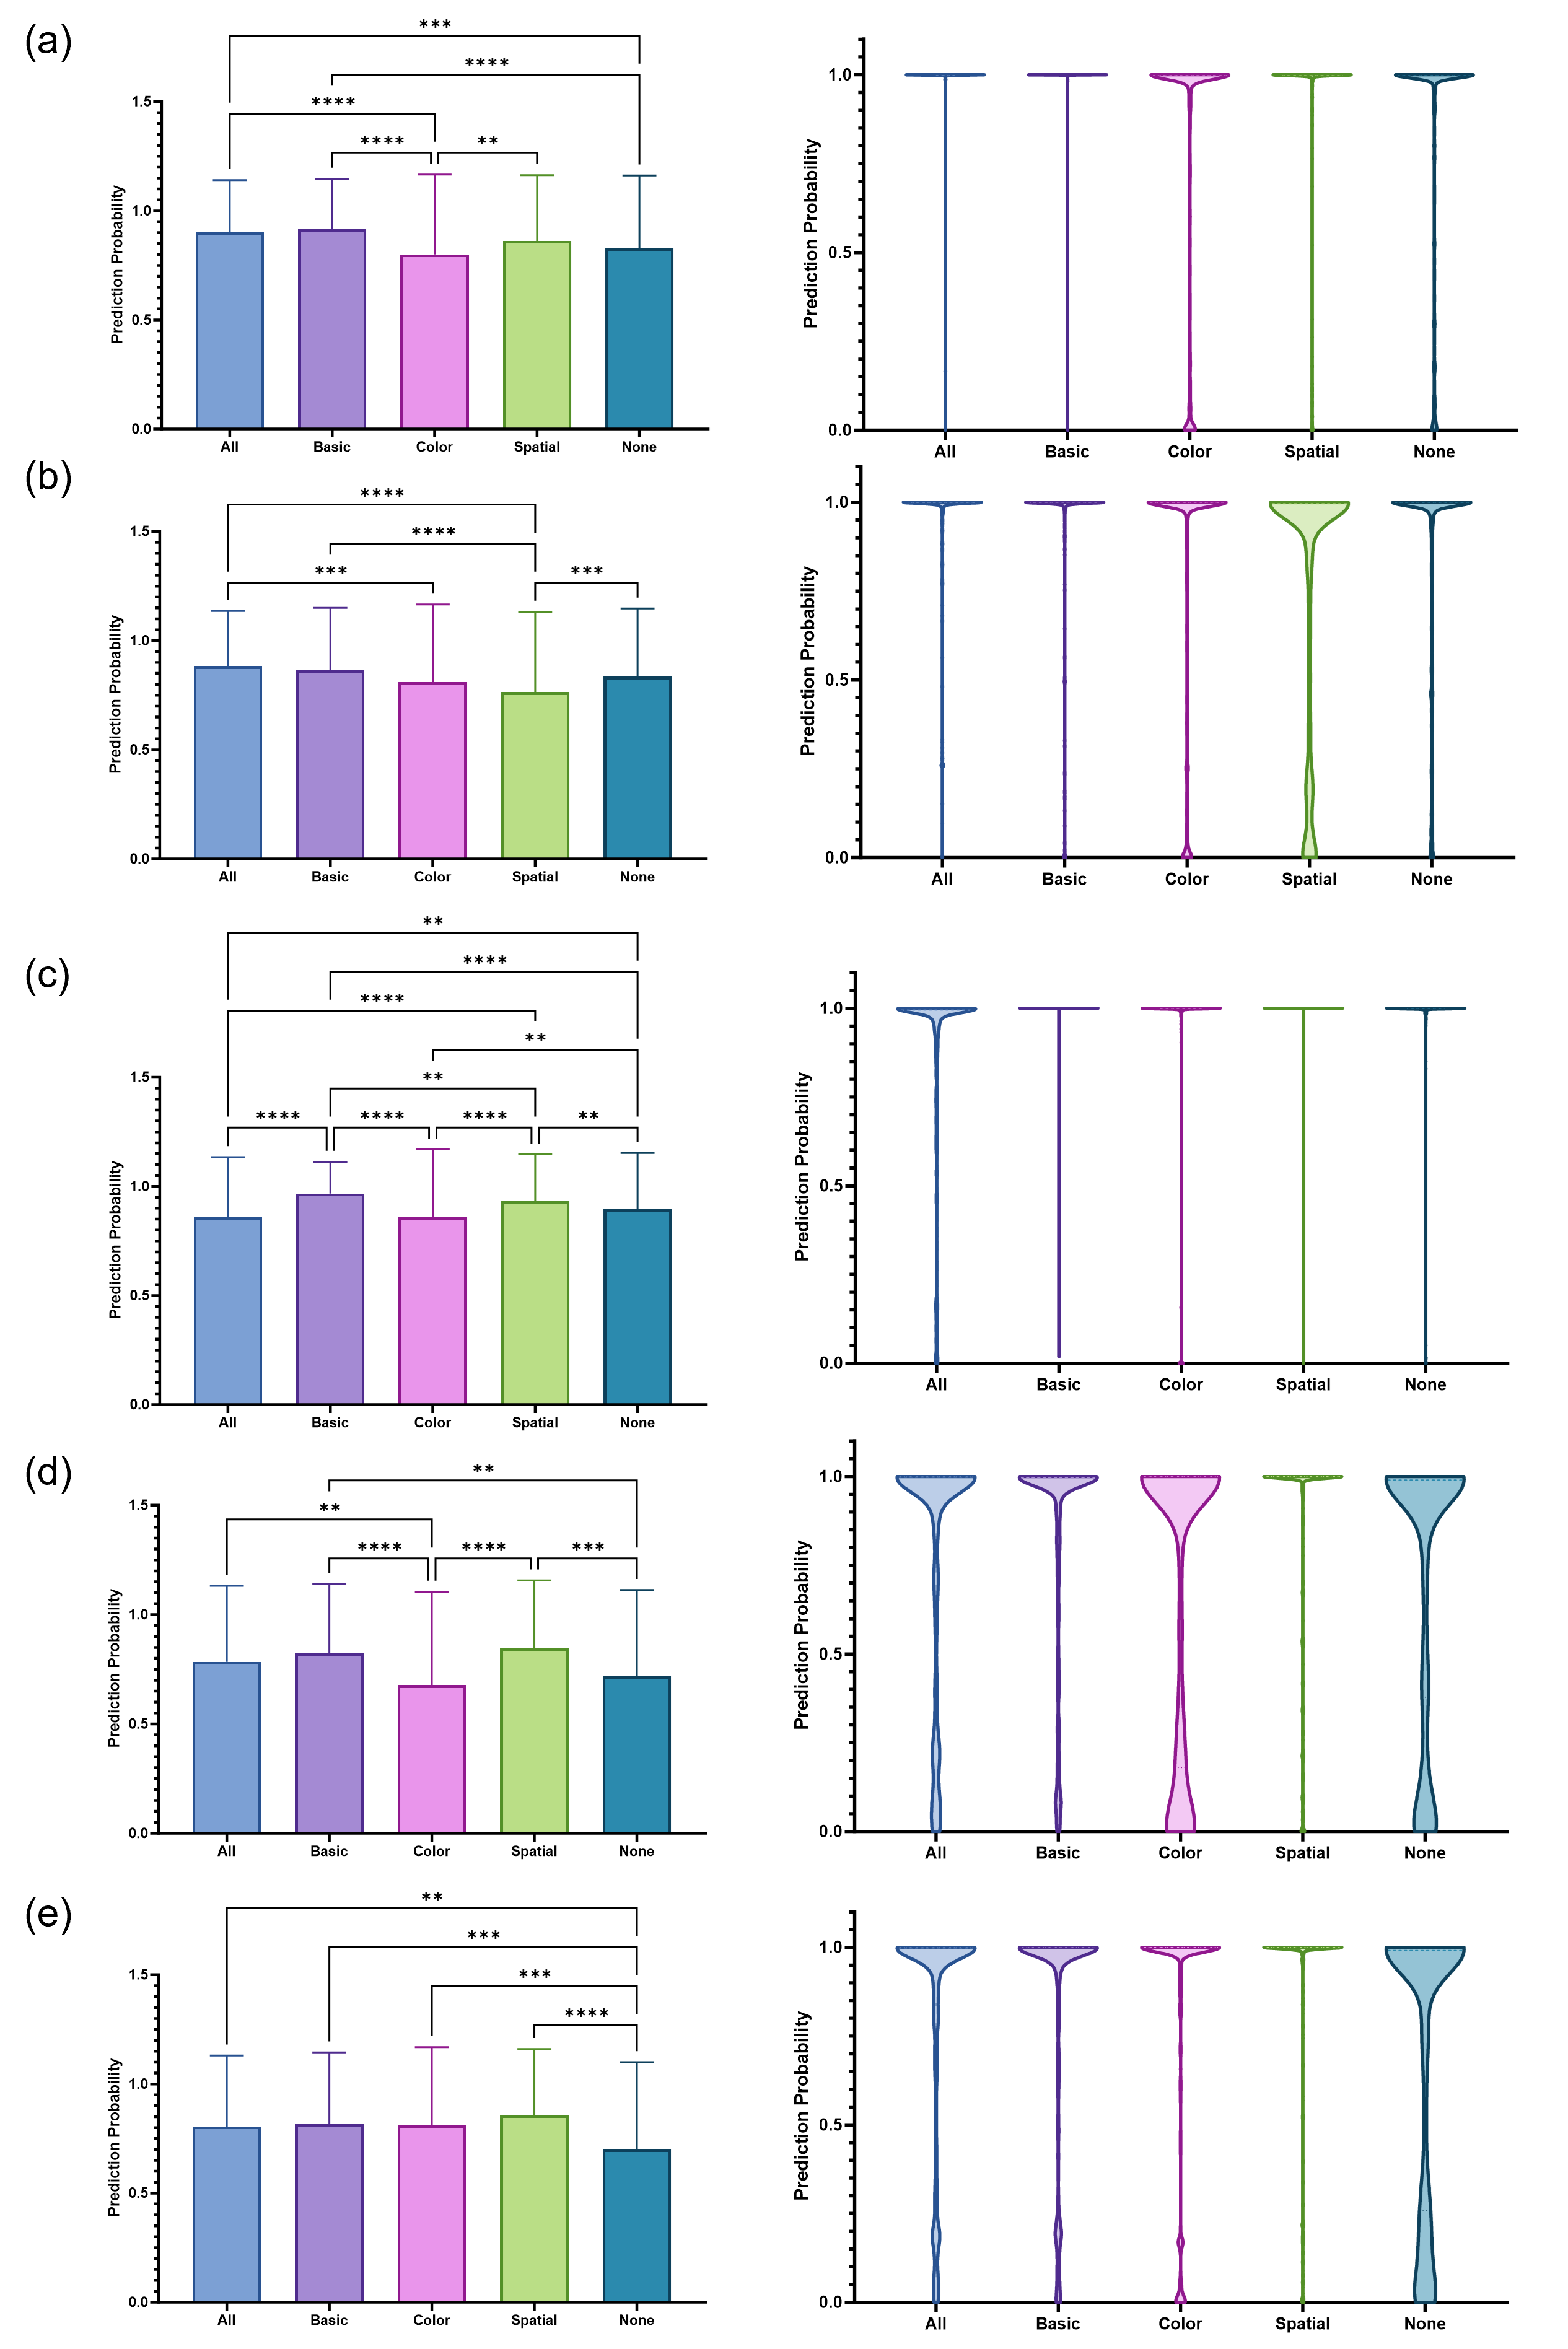


Supplementary figure 1. The impact of different data augmentation methods on the classification performance of VGG for ovarian cancer subtypes. The height of each bar corresponds to the mean predicted probability for each category, and the error bars superimposed on the bars indicate the variance of the predicted probability values within each category. (a) Clear cell ovarian carcinoma. The left subplot indicates that in Group “All”, the mean predicted probability value is significantly higher than that of Group “Color” and Group "None". Similarly, Group “Basic” shows a significantly higher mean predicted probability compared to Group “Color” and Group “None”. Moreover, Group “Spatial” exhibits a significantly higher mean predicted probability than Group “Color”. The right subplot illustrates that within Groups “All”, “Basic”, and “Spatial”, the predicted probability values are more concentrated compared to those in Group “Color” and Group “None”. Additionally, a portion of the predicted probability values in Group “Color” are close to 0. (b) Endometrioid ovarian carcinoma. The left subplot demonstrates that within Group “All”, the mean predicted probability value is significantly higher than that of Group “Color” and Group “Spatial”. Similarly, Group “Basic” exhibits a significantly higher mean predicted probability compared to Group “Spatial”, and Group “None” also shows a significant elevation in mean predicted probability relative to Group “Spatial”. The right subplot reveals that for Groups “All”, “Basic”, and “None”, the predicted probability values are more concentrated compared to Groups “Color” and “Spatial”. Additionally, a substantial number of predicted probability values below 0.5 are observed in Group “Spatial”. (c) High-grade serous carcinoma. The left subplot reveals that, in Group “All”, the mean predicted probability is significantly lower than that of Group “Basic”, Group “Spatial”, and Group “None”. Moreover, Group “Basic” exhibits a significantly higher mean predicted probability compared to Group “Color”, Group “Spatial”, and Group “None”. Additionally, Group “Spatial” shows a significantly higher mean predicted probability than Group “Color” and Group “None”. The right subplot indicates that, within Groups “Color”, “Basic”, “Spatial”, and “None”, the predicted probability values are more concentrated toward 1 compared to Group “All”. (d) Low-grade serous carcinoma. The left subplot illustrates that in Group “All”, the mean predicted probability is significantly higher than that of Group “Color”. Furthermore, Group “Basic” exhibits a significantly higher mean predicted probability compared to both Group “Color” and Group “None”. Similarly, Group “Spatial” shows a significantly higher mean predicted probability than Group “Color” and Group “None”. The right subplot indicates that within Group “Spatial”, the predicted probability values are more concentrated toward 1 compared to those in Groups “All”, “Color”, “Basic”, and “None”. Additionally, a portion of the predicted probability values in Groups “Color”, “None”, and “All” are close to 0. (e) Mucinous carcinoma. The left subplot demonstrates that the mean predicted probability values in Groups “All”, “Basic”, “Color”, and “Spatial” are significantly higher than those in Group “None”. The right subplot reveals that within Group “Spatial”, the predicted probability values are more concentrated toward 1 compared to those in Groups “All”, “Color”, “Basic”, and “None”. Furthermore, a substantial number of predicted probability values close to 0 are observed in Group “None”.

“All” denotes “Combined transformation Augmentation”; “Basic” means “Geometric transformation-only Augmentation”; “Color” indicates “Color transformation-only Augmentation”; “Spatial” stands “Spatial transformation-only Augmentation”; “None” represents “No augmentation Baseline”. Statistical significance was evaluated using one-way ANOVA.


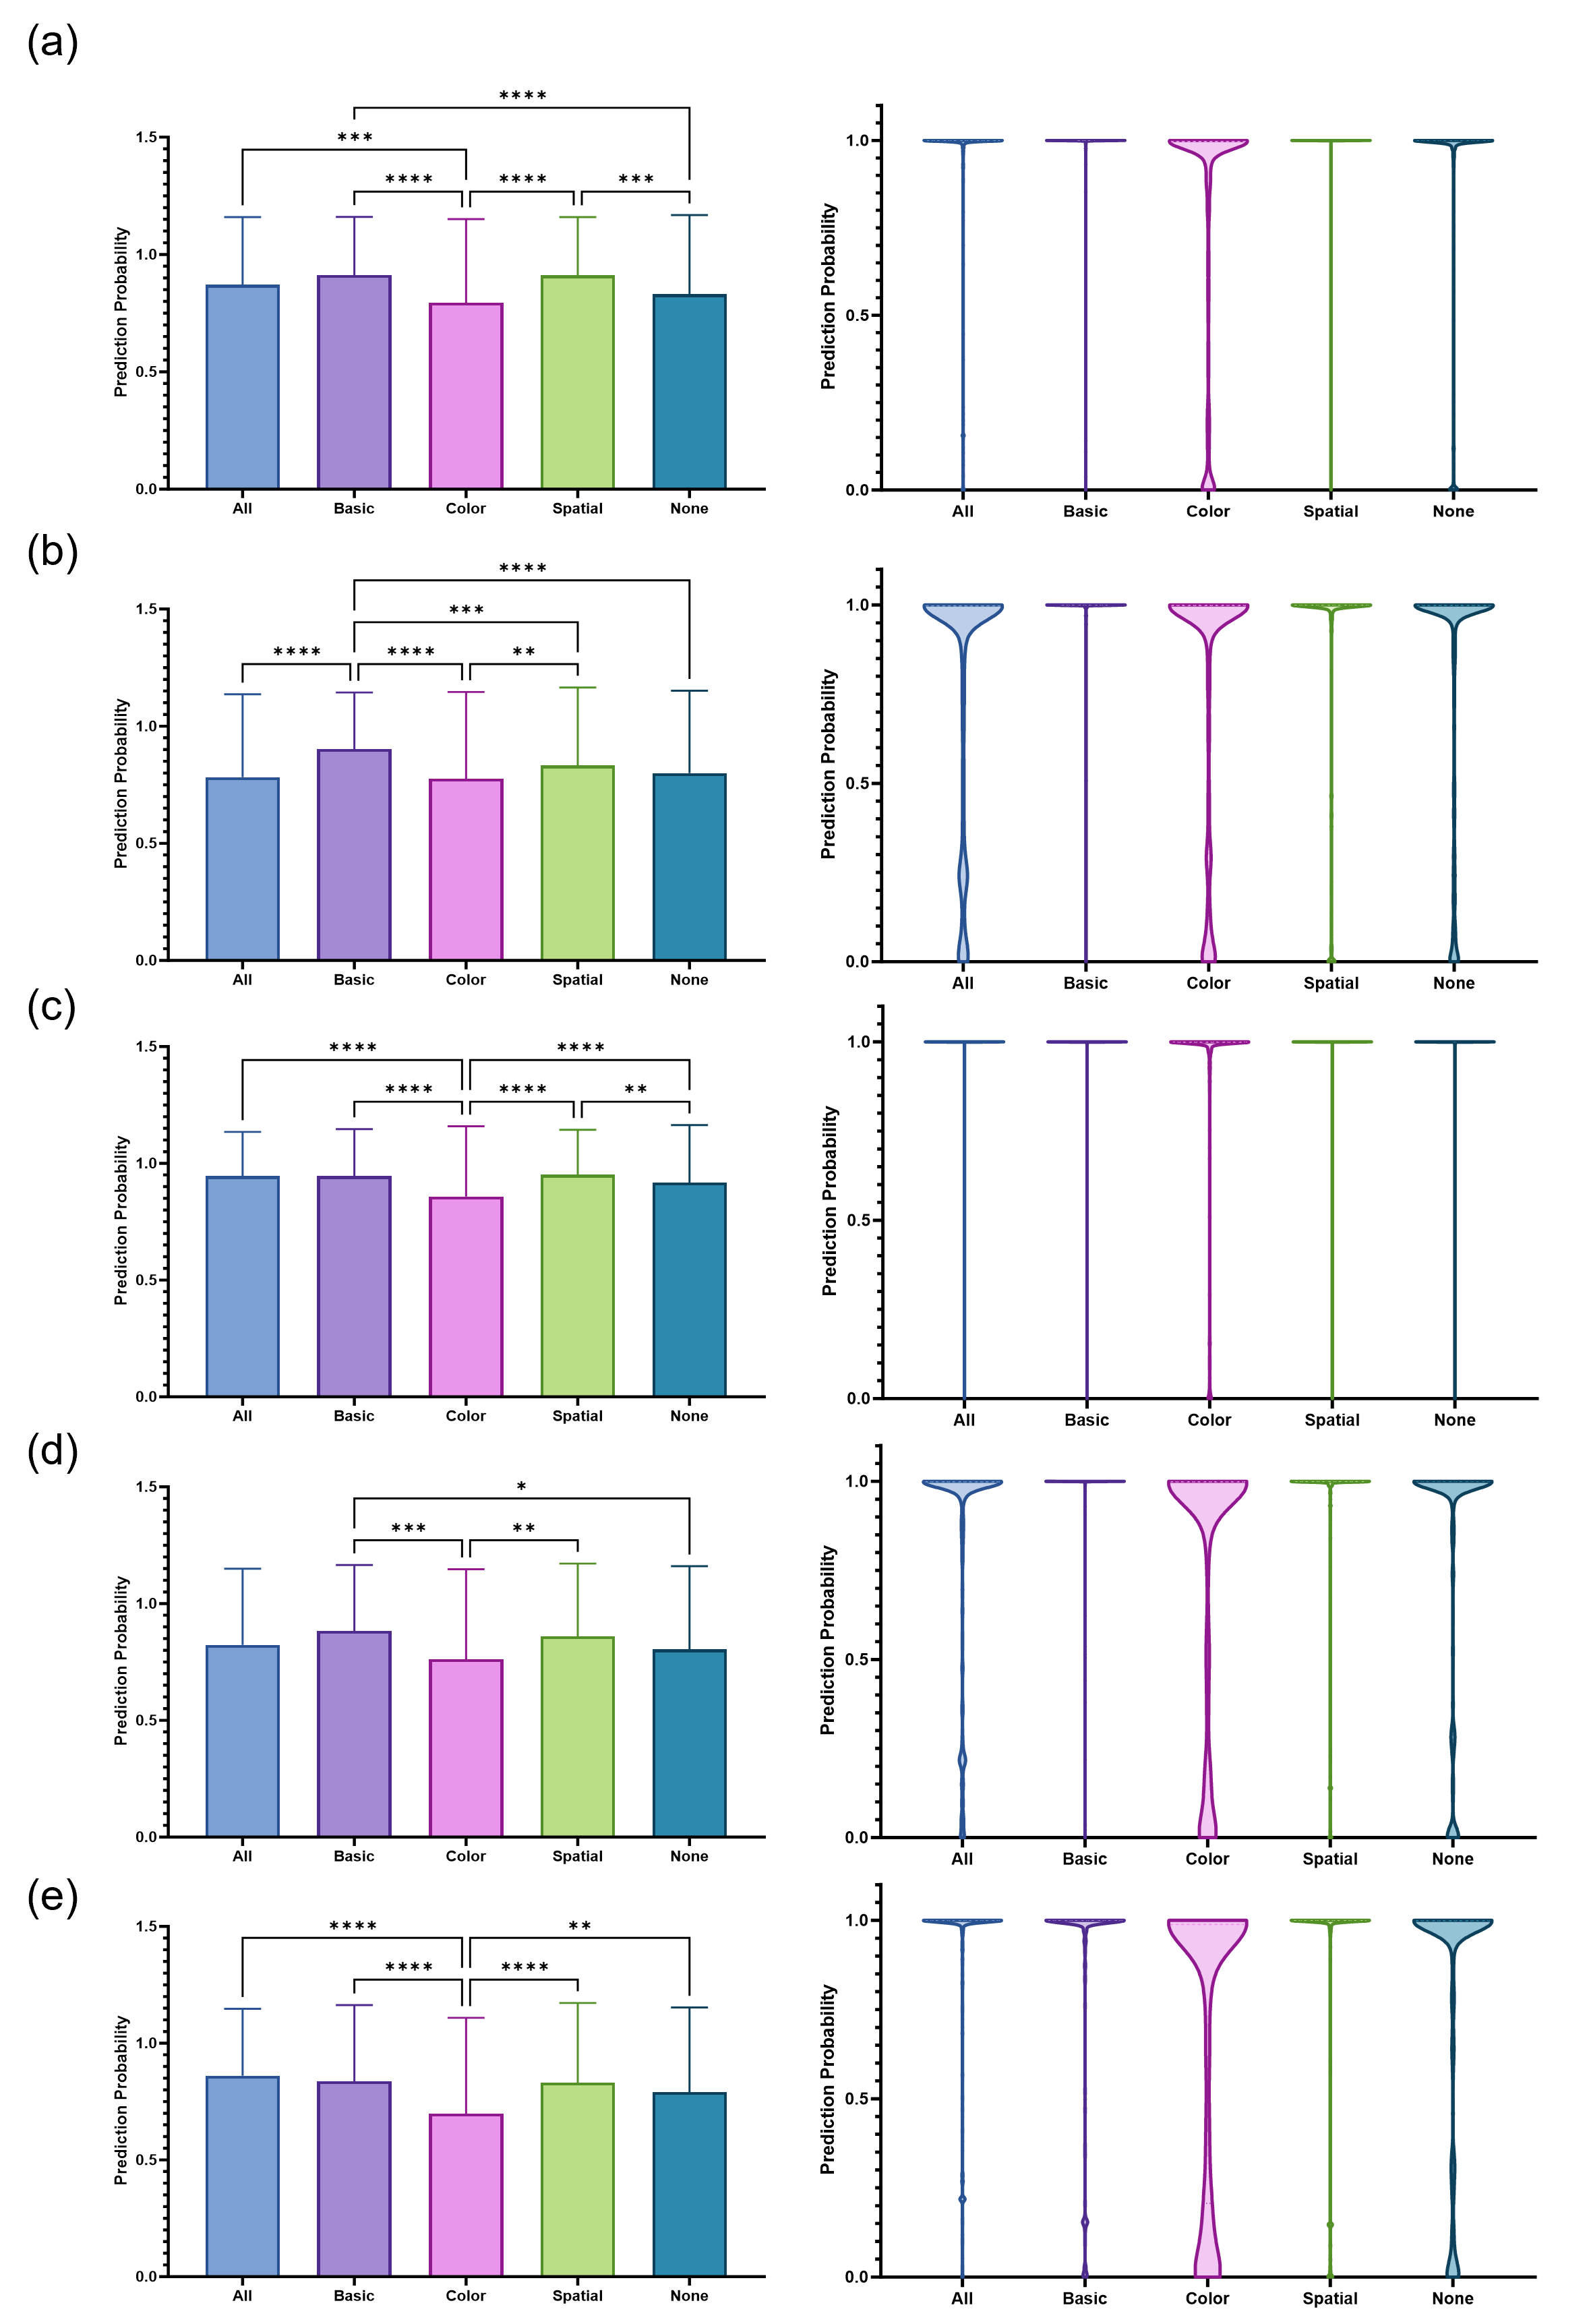


Supplementary figure 2. The impact of different data augmentation methods on the classification performance of ViT for ovarian cancer subtypes. The height of each bar corresponds to the mean predicted probability for each category, and the error bars superimposed on the bars indicate the variance of the predicted probability values within each category. (a) Clear cell ovarian carcinoma. The left subplot indicates that the mean predicted probability in Group “All” is significantly higher than that in Group “Color”. Additionally, the mean predicted probability in Group “Basic” is significantly greater than in both Group “Color” and Group “None”. Similarly, the mean predicted probability in Group “Spatial” is significantly higher than in Group “Color” and Group “None”. The right subplot shows that the predicted probability values in Groups “All”, “Basic”, “Spatial”, and “None” are more concentrated toward 1 compared to those in Group “Color”. Furthermore, some predicted probability values in Group “Color” are close to 0. (b) Endometrioid ovarian carcinoma. The left subplot reveals that, in Group “All”, the mean predicted probability is significantly lower than that of Group “Basic”. Moreover, the mean predicted probability in Group “Basic” is significantly higher than in Groups “Color”, “Spatial”, and “None”. Additionally, the mean predicted probability in Group “Spatial” is significantly higher than in Group “Color”. The right subplot illustrates that the predicted probability values in Groups “Basic” and “Spatial” are more concentrated toward 1 compared to those in Groups “All”, “Color”, and “None”. Furthermore, some predicted probability values are close to 0 in Groups “Color”, “All”, and “None”. (c) High-grade serous carcinoma. The left subplot indicates that the mean predicted probability in Group “All” is significantly higher than that in Group “Color”. Additionally, the mean predicted probability in Group “Basic” is significantly higher than in Group “Color”. Furthermore, the mean predicted probability in Group “Spatial” is significantly higher than in both Group “Color” and Group “None”. The right subplot shows that the predicted probability values in Groups “Basic”, “Spatial”, “All”, “Color”, and “None” are all more concentrated toward 1. (d) Low-grade serous carcinoma. The left subplot reveals that the mean predicted probability in Group “Basic” is significantly higher than that in Group “Color” and Group “None”. Additionally, the mean predicted probability in Group “Spatial” is significantly higher than that in Group “Color”. The right subplot indicates that the predicted probability values in Groups “Basic” and “Spatial” are more concentrated toward 1 compared to those in Groups “All”, “Color”, and “None”. Furthermore, some predicted probability values are close to 0 in Groups “Color”, “All”, and “None”. (e) Mucinous carcinoma. The left subplot demonstrates that the mean predicted probabilities in Groups “All” and “Basic” are significantly higher than those in Group “Color”. Moreover, the mean predicted probabilities in Groups “Spatial” and “None” are also significantly higher than those in Group “Color”. The right subplot shows that the predicted probability values in Groups “All”, “Basic”, and “Spatial” are more concentrated toward 1 compared to those in Groups “Color” and “None”. Additionally, some predicted probability values in Groups “Color” and “None” are close to 0. Significant differences were assessed via one-way ANOVA.


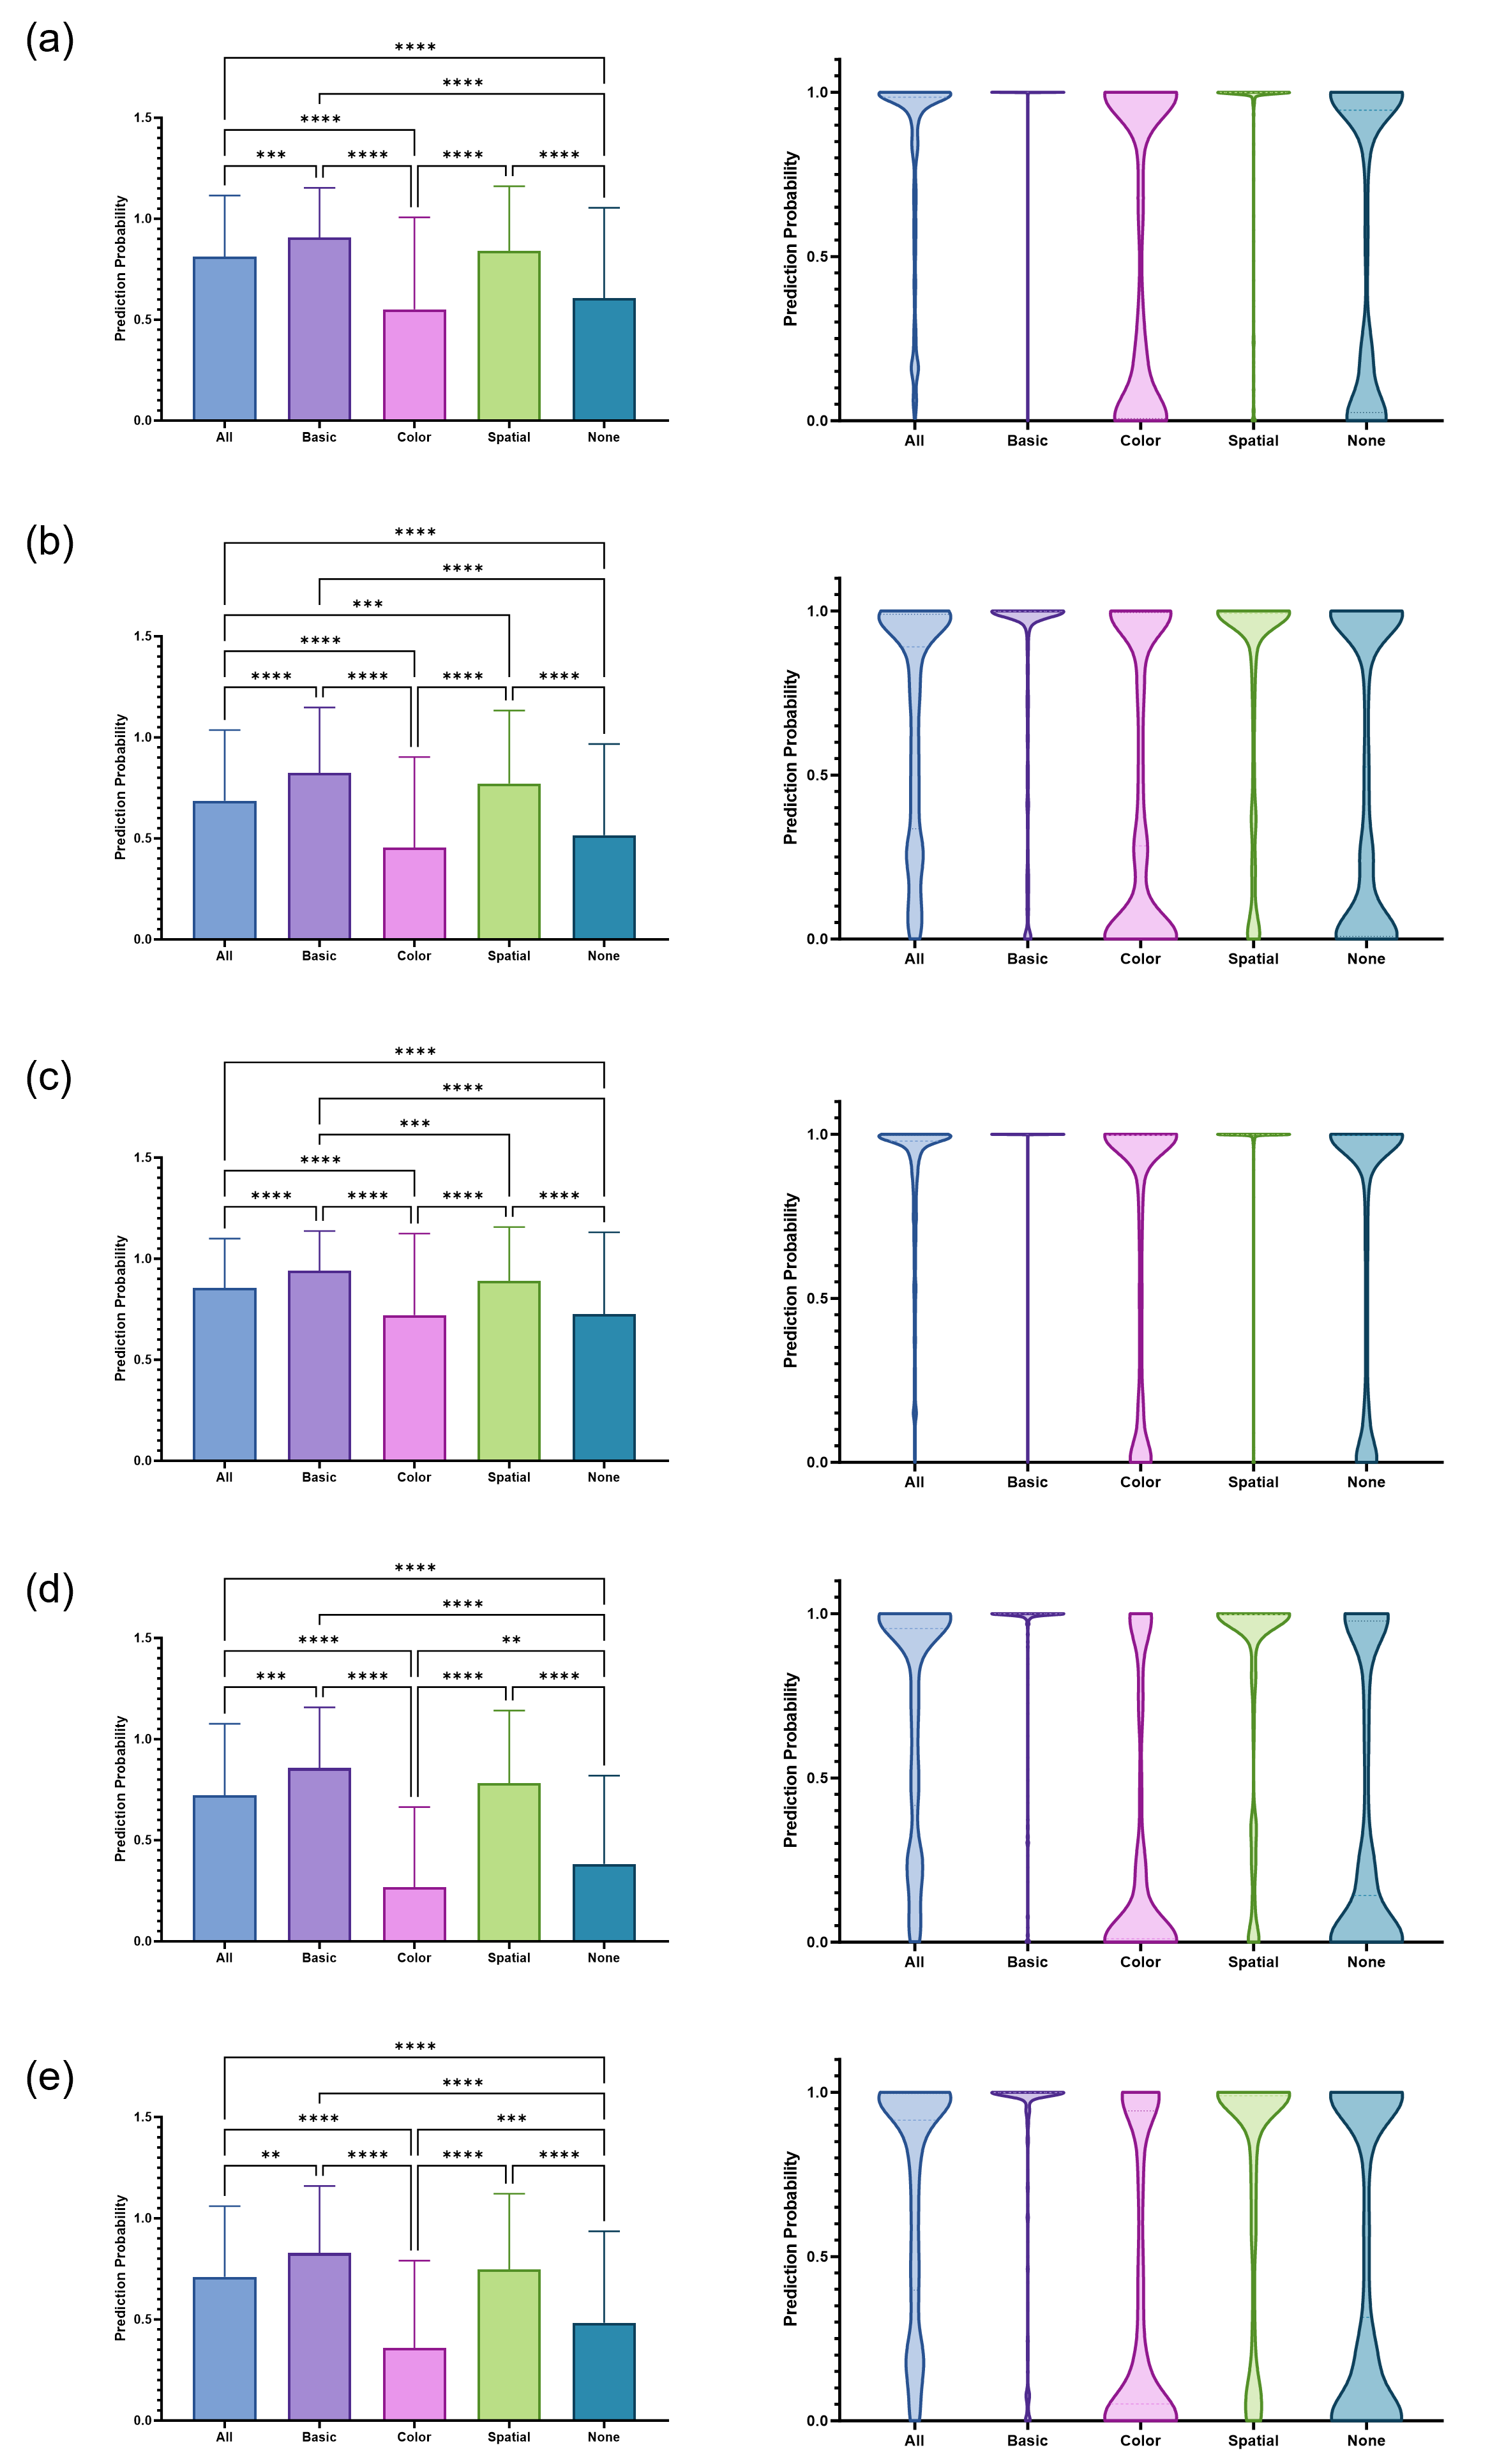


Supplementary figure 3. The impact of different data augmentation methods on the classification performance of our methods for ovarian cancer subtypes. (a) Clear cell ovarian carcinoma. The left subplot indicates that, in Group “All”, the mean predicted probability is significantly lower than that of Group “Basic”, but significantly higher than that of Group “Color” and Group “None”. Additionally, the mean predicted probability in Group “Basic” is significantly higher than in Group “Color” and Group “None”. The mean predicted probability in Group “Spatial” is also significantly higher than in Group “Color” and Group “None”. The right subplot shows that the predicted probability values in Groups “Basic” and “Spatial” are more concentrated toward 1 compared to those in Groups “All”, “Color”, and “None”. Furthermore, some predicted probability values in Groups “Color”, “All”, and “None” are close to 0. (b) Endometrioid ovarian carcinoma. The left subplot indicates that the mean predicted probability in Group “All” is significantly lower than that in Groups “Basic” and “Spatial”, but significantly higher than that in Groups “Color” and “None”. Additionally, the mean predicted probability in Group “Basic” is significantly higher than that in Groups “Color” and “None”. The mean predicted probability in Group “Spatial” is also significantly higher than that in Groups “Color” and “None”. The right subplot shows that the predicted probability values in Groups “Basic” and “Spatial” are more concentrated toward 1 compared to those in Groups “All”, “Color”, and “None”. (c) High-grade serous carcinoma. The left subplot indicates that the mean predicted probability in Group “All” is significantly lower than that in Group “Basic”, but significantly higher than that in Groups “Color” and “None”. Furthermore, the mean predicted probability in Group “Basic” is significantly higher than that in Groups “Color”, “None”, and “Spatial”. The mean predicted probability in Group “Spatial” is also significantly higher than that in Groups “Color” and “None”. The right subplot shows that the predicted probability values in Groups “Basic” and “Spatial” are more concentrated toward 1 compared to those in Groups “All”, “Color”, and “None”. (d) Low-grade serous carcinoma. The left subplot indicates that the mean predicted probability in Group “All” is significantly lower than that in Group “Basic”, but significantly higher than that in Groups “Color” and “None”. Furthermore, the mean predicted probability in Group “Basic” is significantly higher than in Groups “Color”, “None”, and “Spatial”. The mean predicted probability in Group “Spatial” is also significantly higher than in Groups “Color” and “None”. Additionally, the mean predicted probability in Group “None” is significantly higher than in Group “Color”. The right subplot shows that the predicted probability values in Groups “Basic” and “Spatial” are more concentrated toward 1 compared to those in Groups “All”, “Color”, and “None”. (e) Mucinous carcinoma. The left subplot illustrates that the mean predicted probability in Group “All” is significantly lower than that in Group “Basic”, but significantly higher than in Groups “Color” and “None”. Moreover, the mean predicted probability in Group “Basic” is significantly higher than in Groups “Color” and “None”. The mean predicted probability in Group “Spatial” is also significantly higher than in Groups “Color” and “None”. Additionally, the mean predicted probability in Group “None” is significantly higher than in Group “Color”. The right subplot shows that the predicted probability values in Groups “Basic” and “Spatial” are more concentrated toward 1 compared to those in Groups “All”, “Color”, and “None”. Significant differences were assessed via one-way ANOVA.


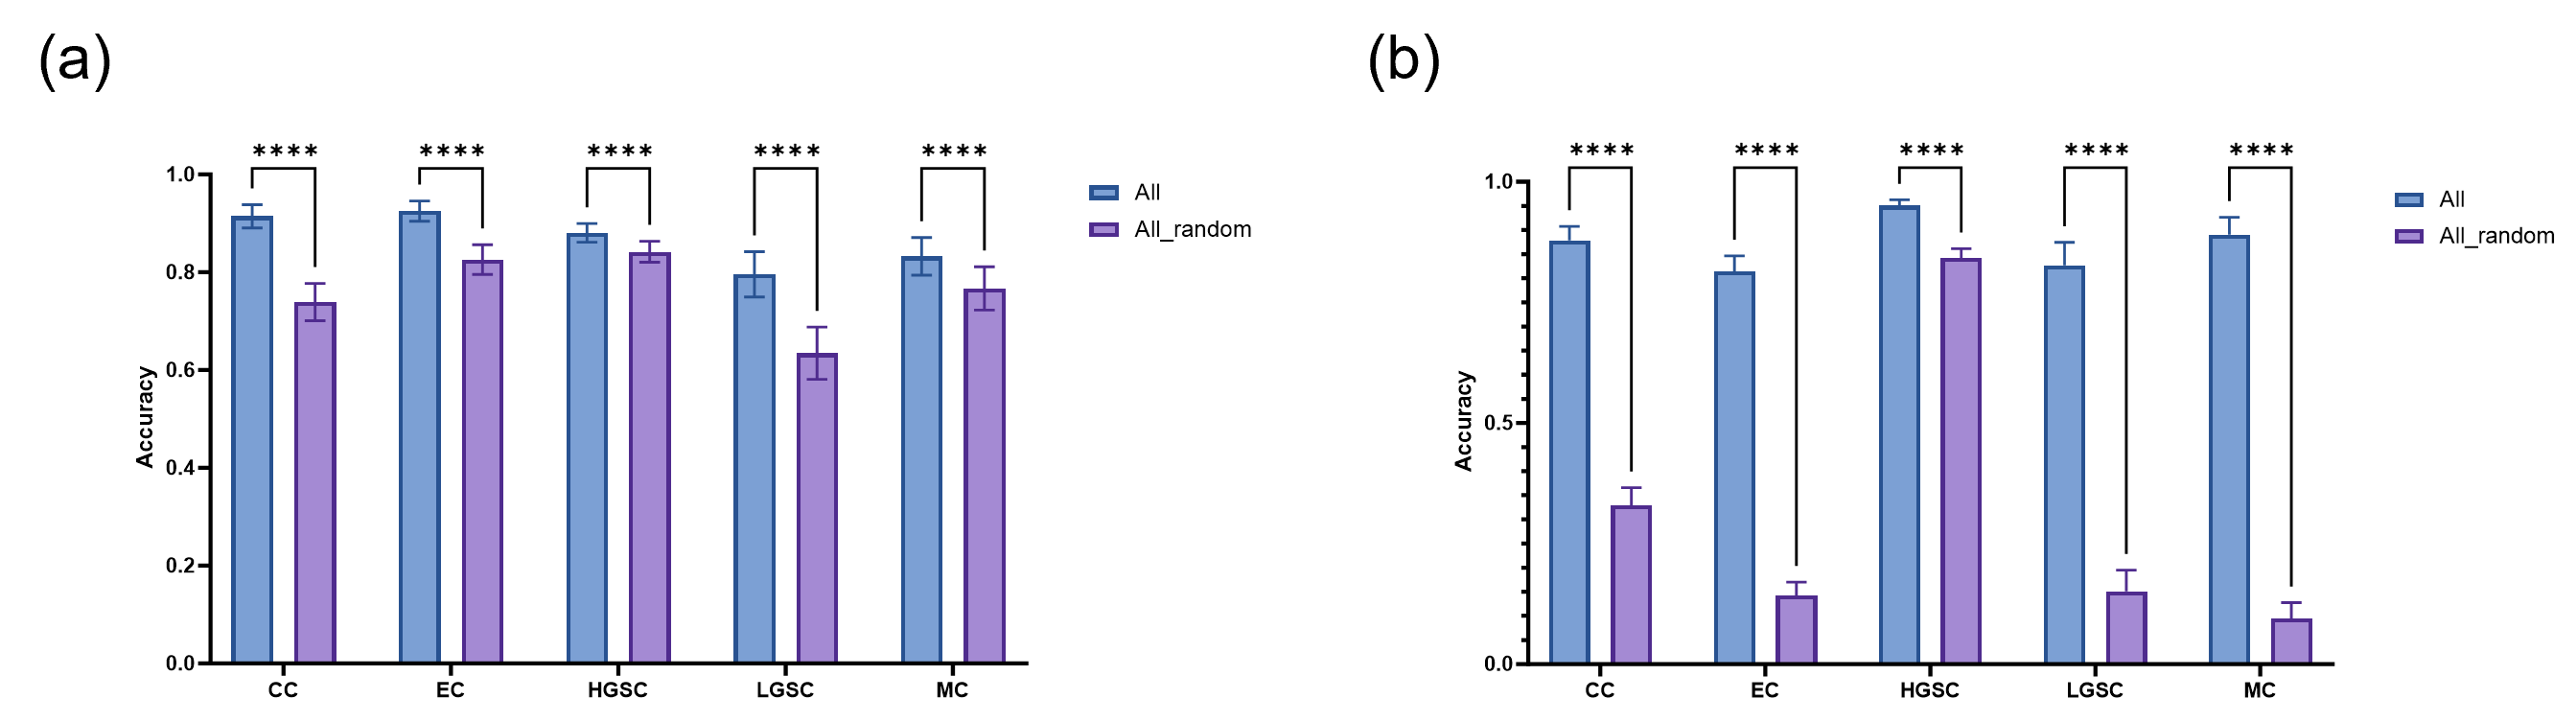


Supplementary figure 4. The impact of using pre-trained weights during model parameter initialization on the model's classification performance for ovarian cancer subtypes. The data augmentation method adopts the “Combined Transformation Augmentation” approach. “All random”means that the model parameters are randomly initialized. (a) VGG. This figure demonstrates that the classification performance of the pre-trained VGG model is significantly higher than that of the non-pre-trained VGG model across different ovarian cancer subtypes. (b) ViT. This figure demonstrates that the classification performance of the pre-trained ViT model is significantly higher than that of the non-pre-trained ViT model across different ovarian cancer subtypes. Statistical significance was evaluated using one-way ANOVA.


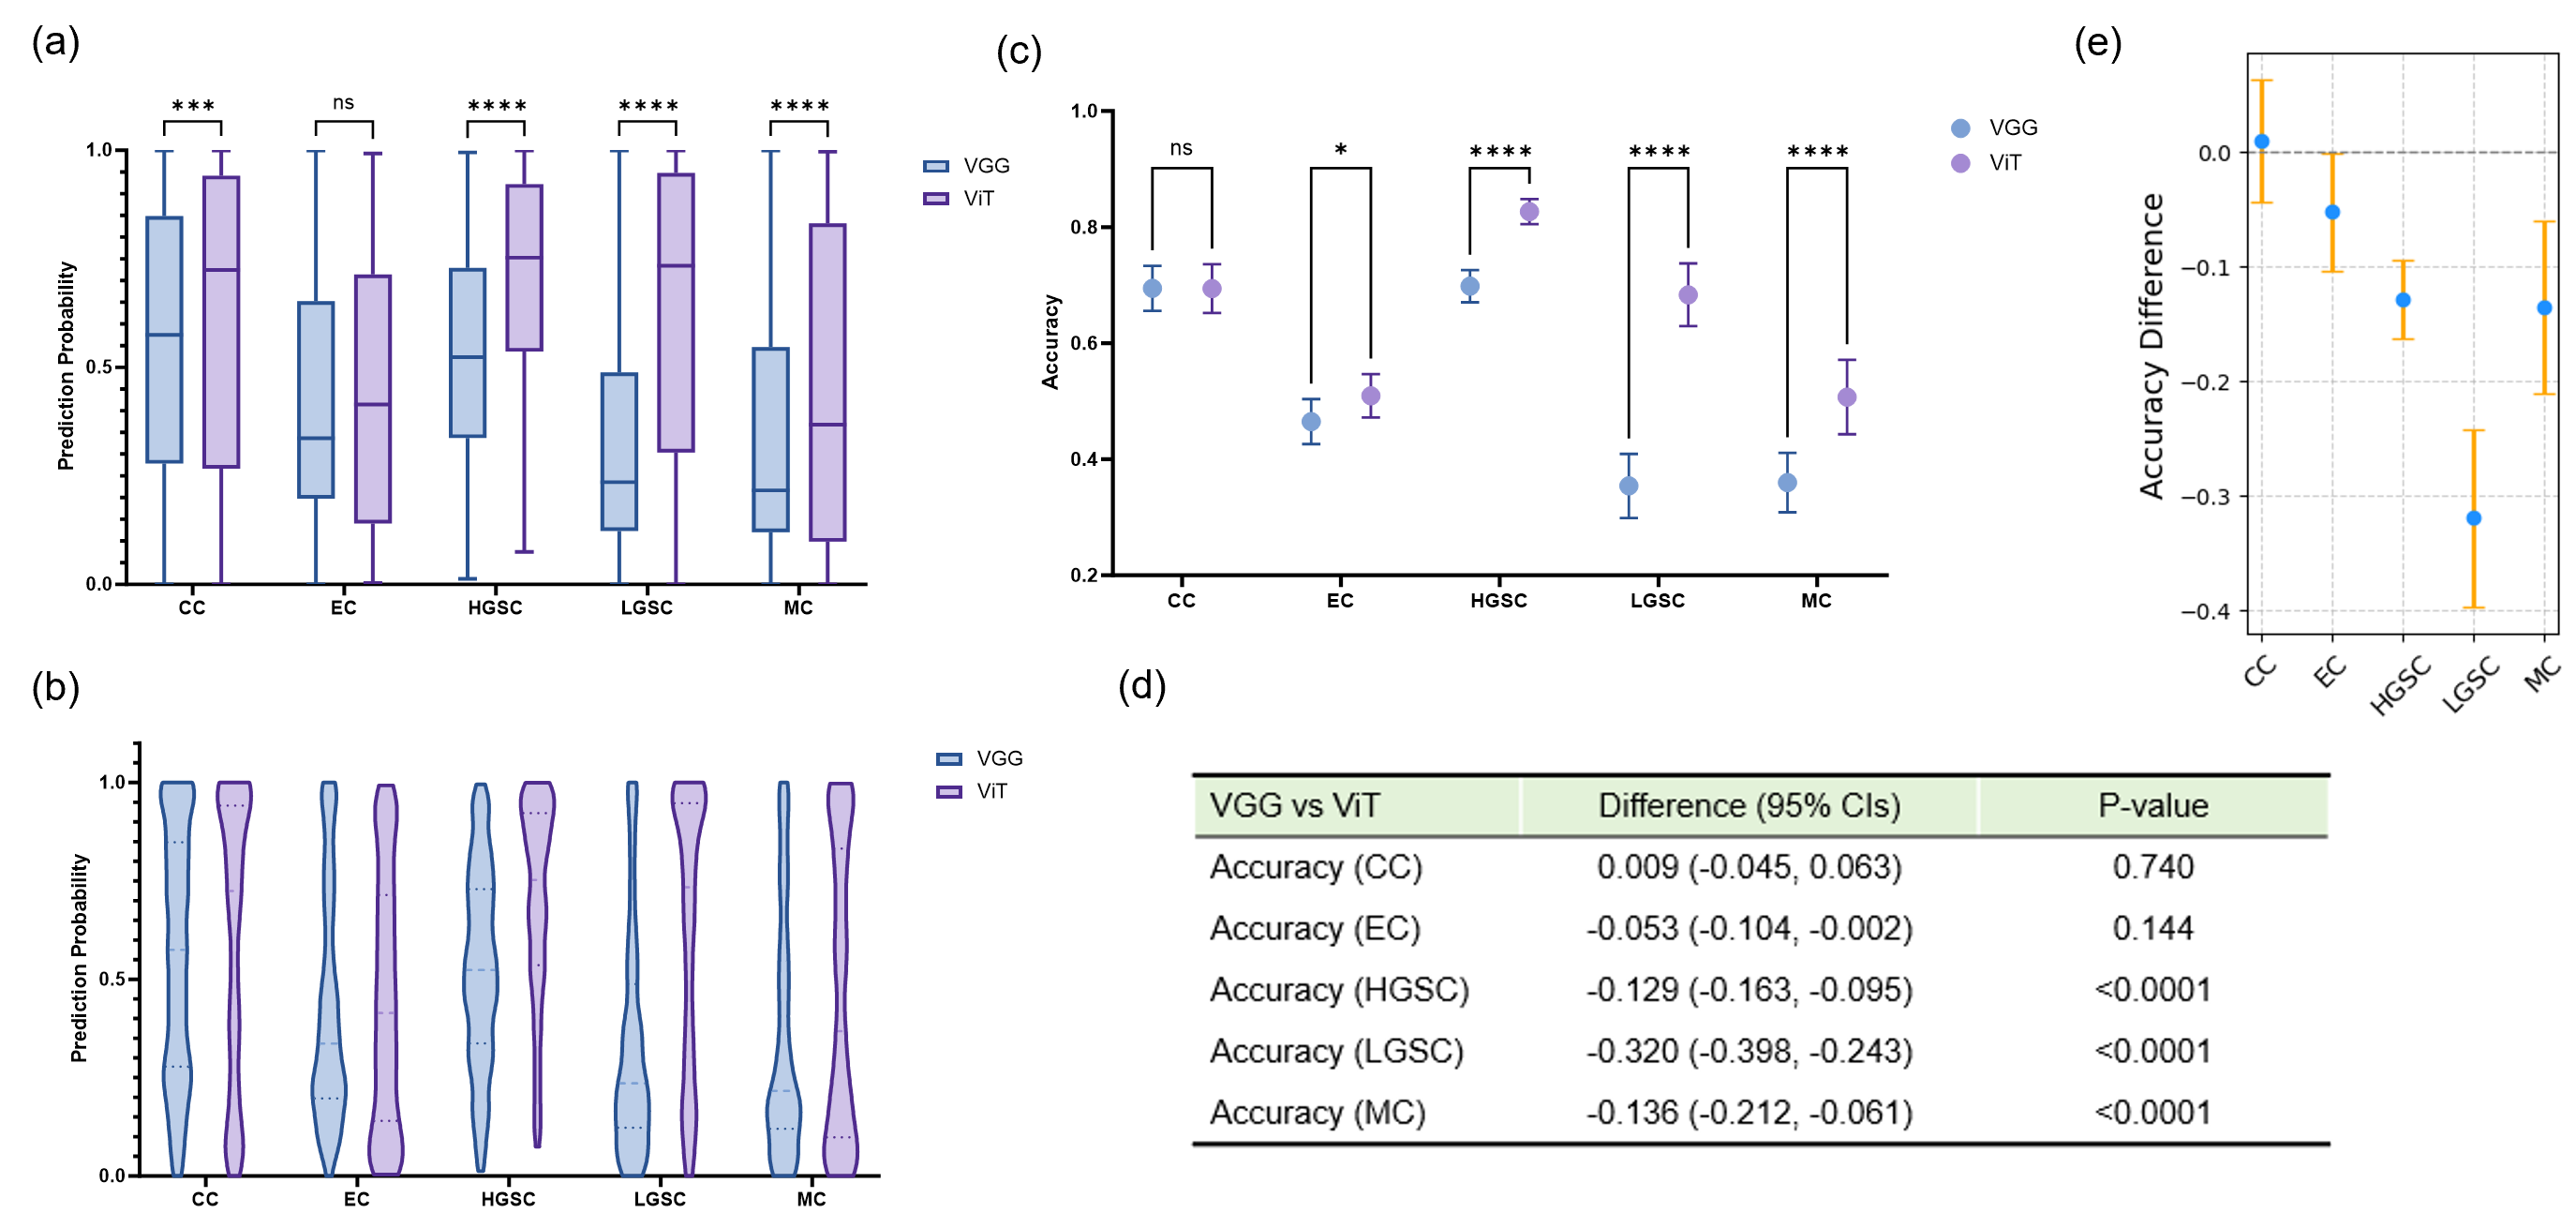


Supplementary figure 5. After fixing the weights of the feature extraction module and fine-tuning the classifier layer, the classification performance differences of different models across various ovarian cancer subtypes were compared, thereby exploring the differences in the generalization capabilities of modules with different structures. (a) Across different ovarian cancer subtypes, the mean predicted probability of ViT is significantly higher than that of VGG. (b) Across different ovarian cancer subtypes, the predicted probability values of ViT are more concentrated in the region greater than 0.5 compared to those of VGG. (c) In the ovarian cancer subtypes of EC, HGSC, LGSC, and MC, the predictive accuracy of ViT is significantly higher than that of VGG. (d) The McNemar’s Chi-squared test results of unpretrained baseline models. This figure presents the differences in classification accuracy and the corresponding p-values of various models across different ovarian cancer subtypes. Confidence intervals for the accuracy metrics were calculated using the normal approximation method. (e) This figure provides a graphical representation of the differences in classification accuracy between the VGG and ViT models. Significant differences were assessed via one-way ANOVA.


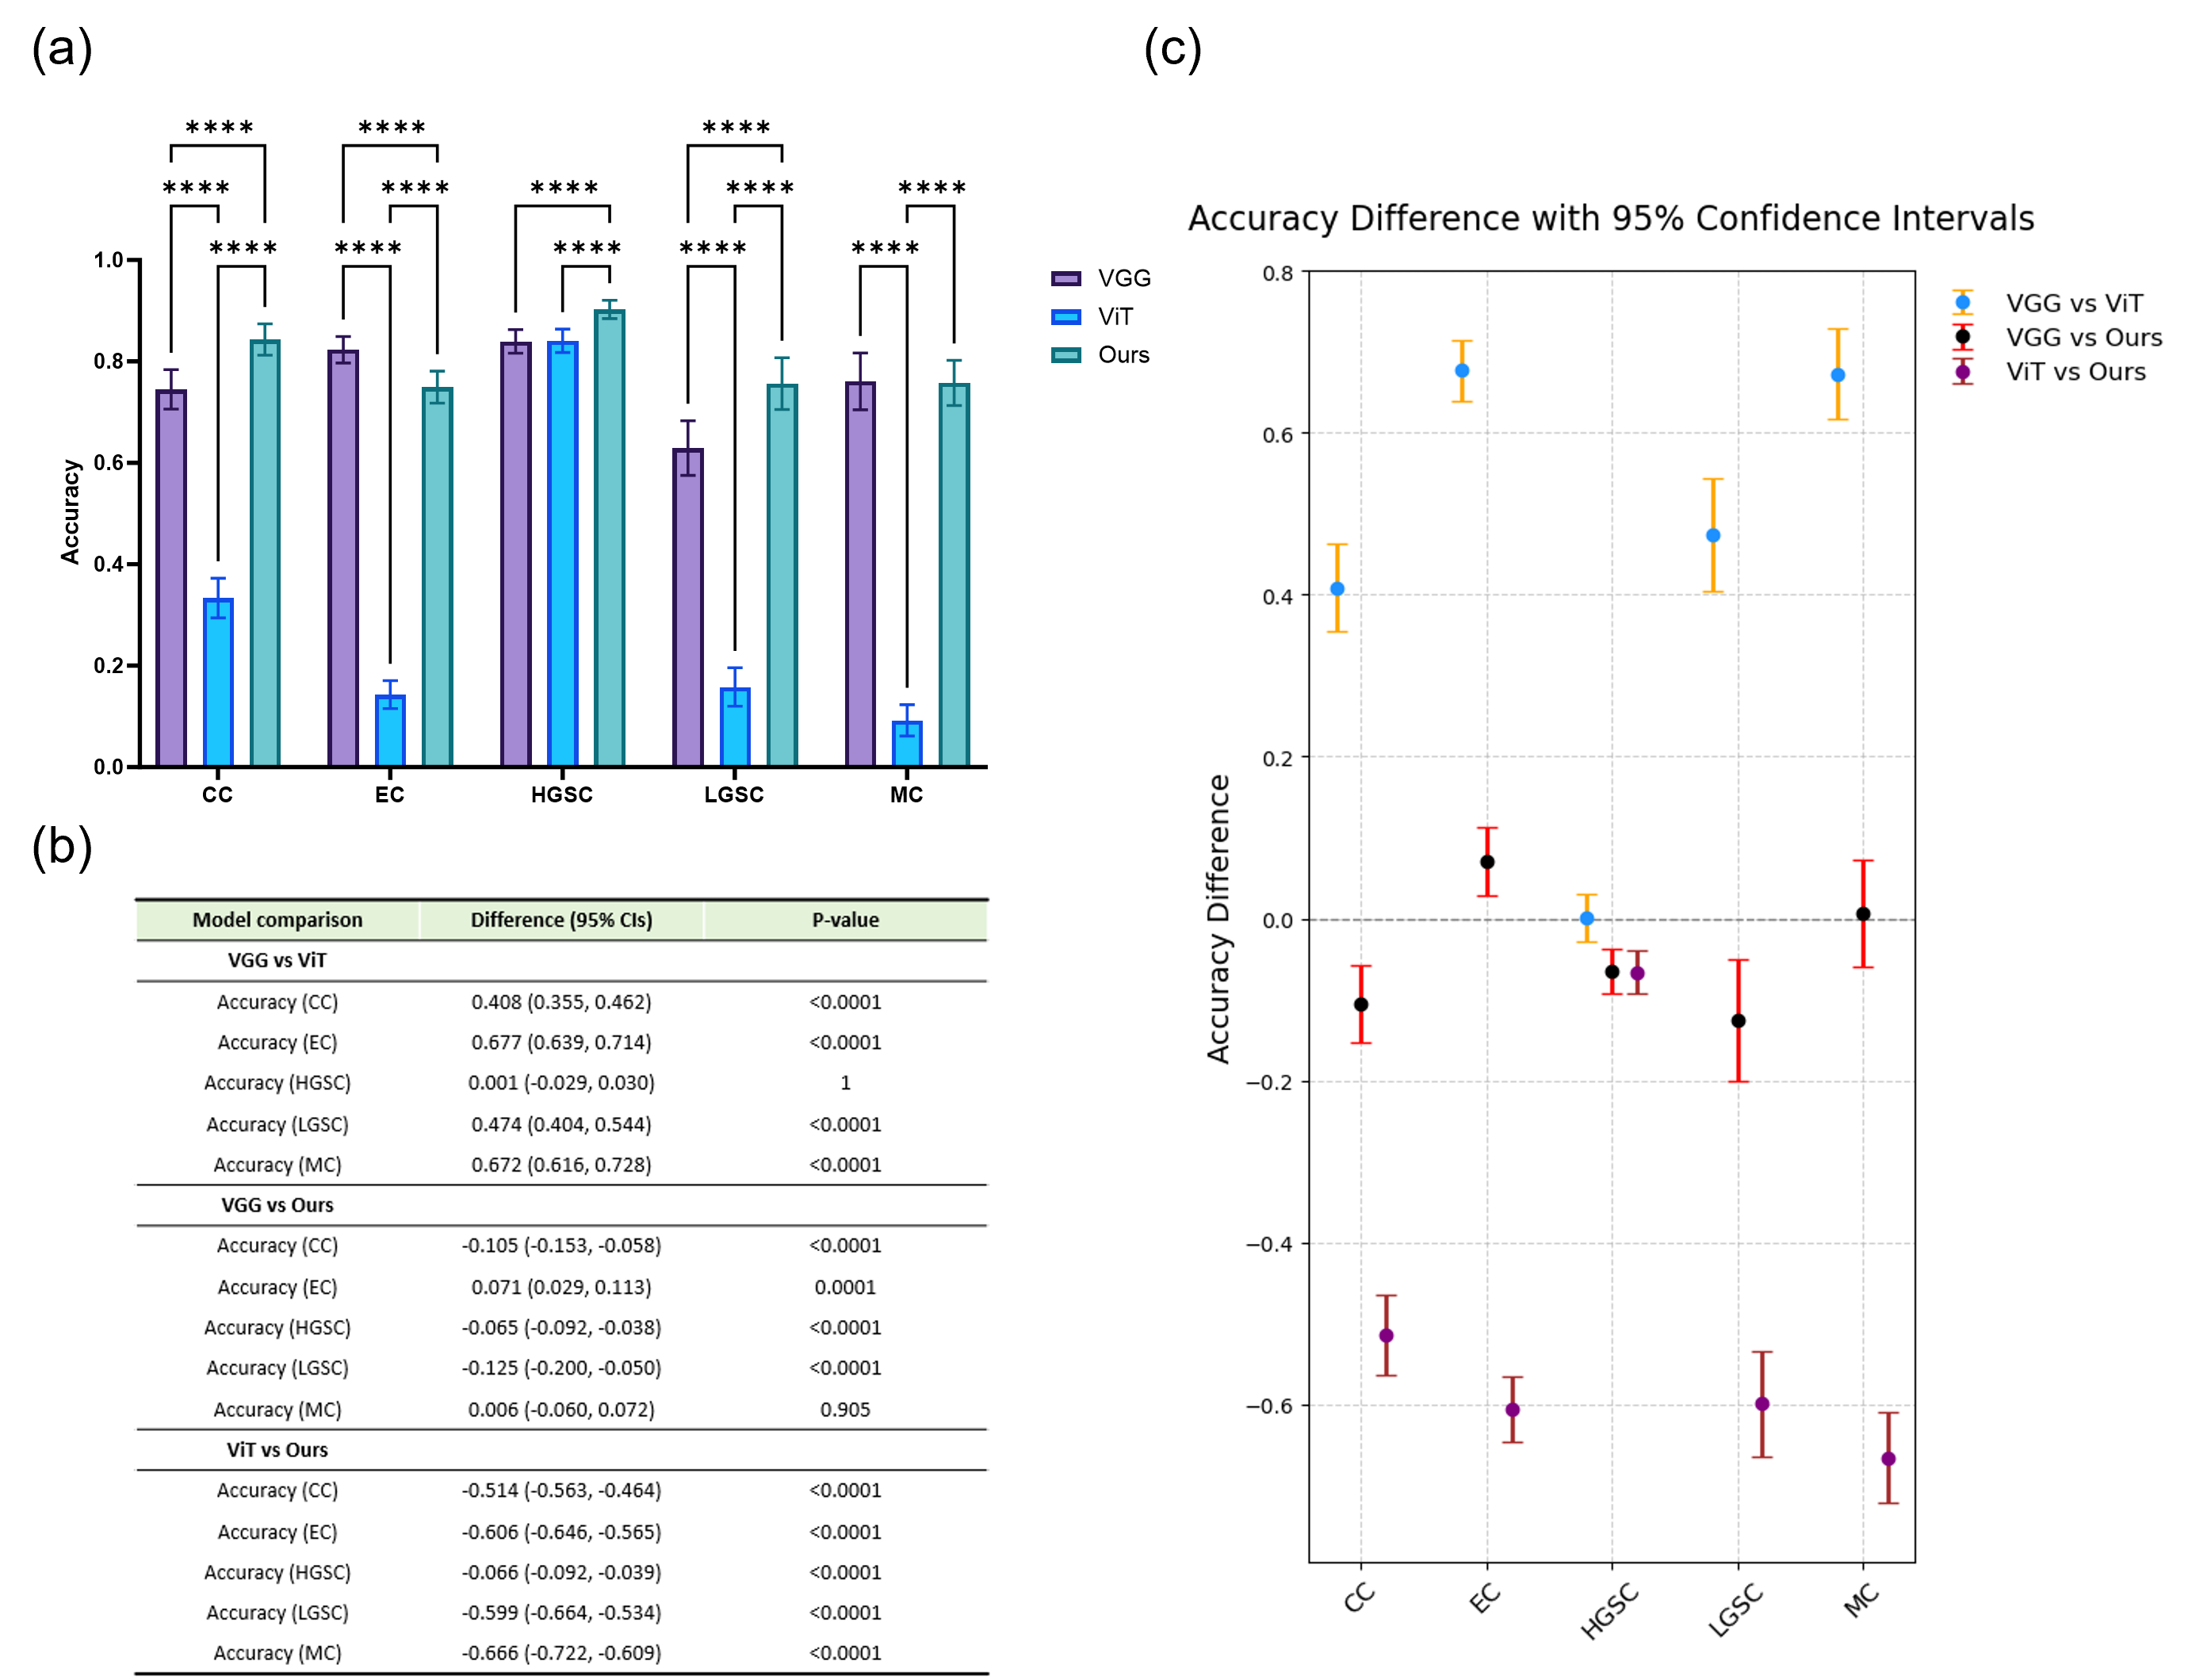


Supplementary figure 6. Comparison between our model and the unpretrained baseline models. (a) With the exception of MC, our model significantly outperforms other baseline models in terms of classification performance across different ovarian cancer subtypes. In the case of MC, the classification performance of our model is significantly higher than that of ViT. Statistical significance was evaluated using one-way ANOVA. (b) The McNemar’s Chi-squared test results of unpretrained baseline models and our model. Confidence intervals for the accuracy metrics were calculated using the normal approximation method. (c) Graphical representation of the differences in classification accuracy between unpretrained baseline models and our model.


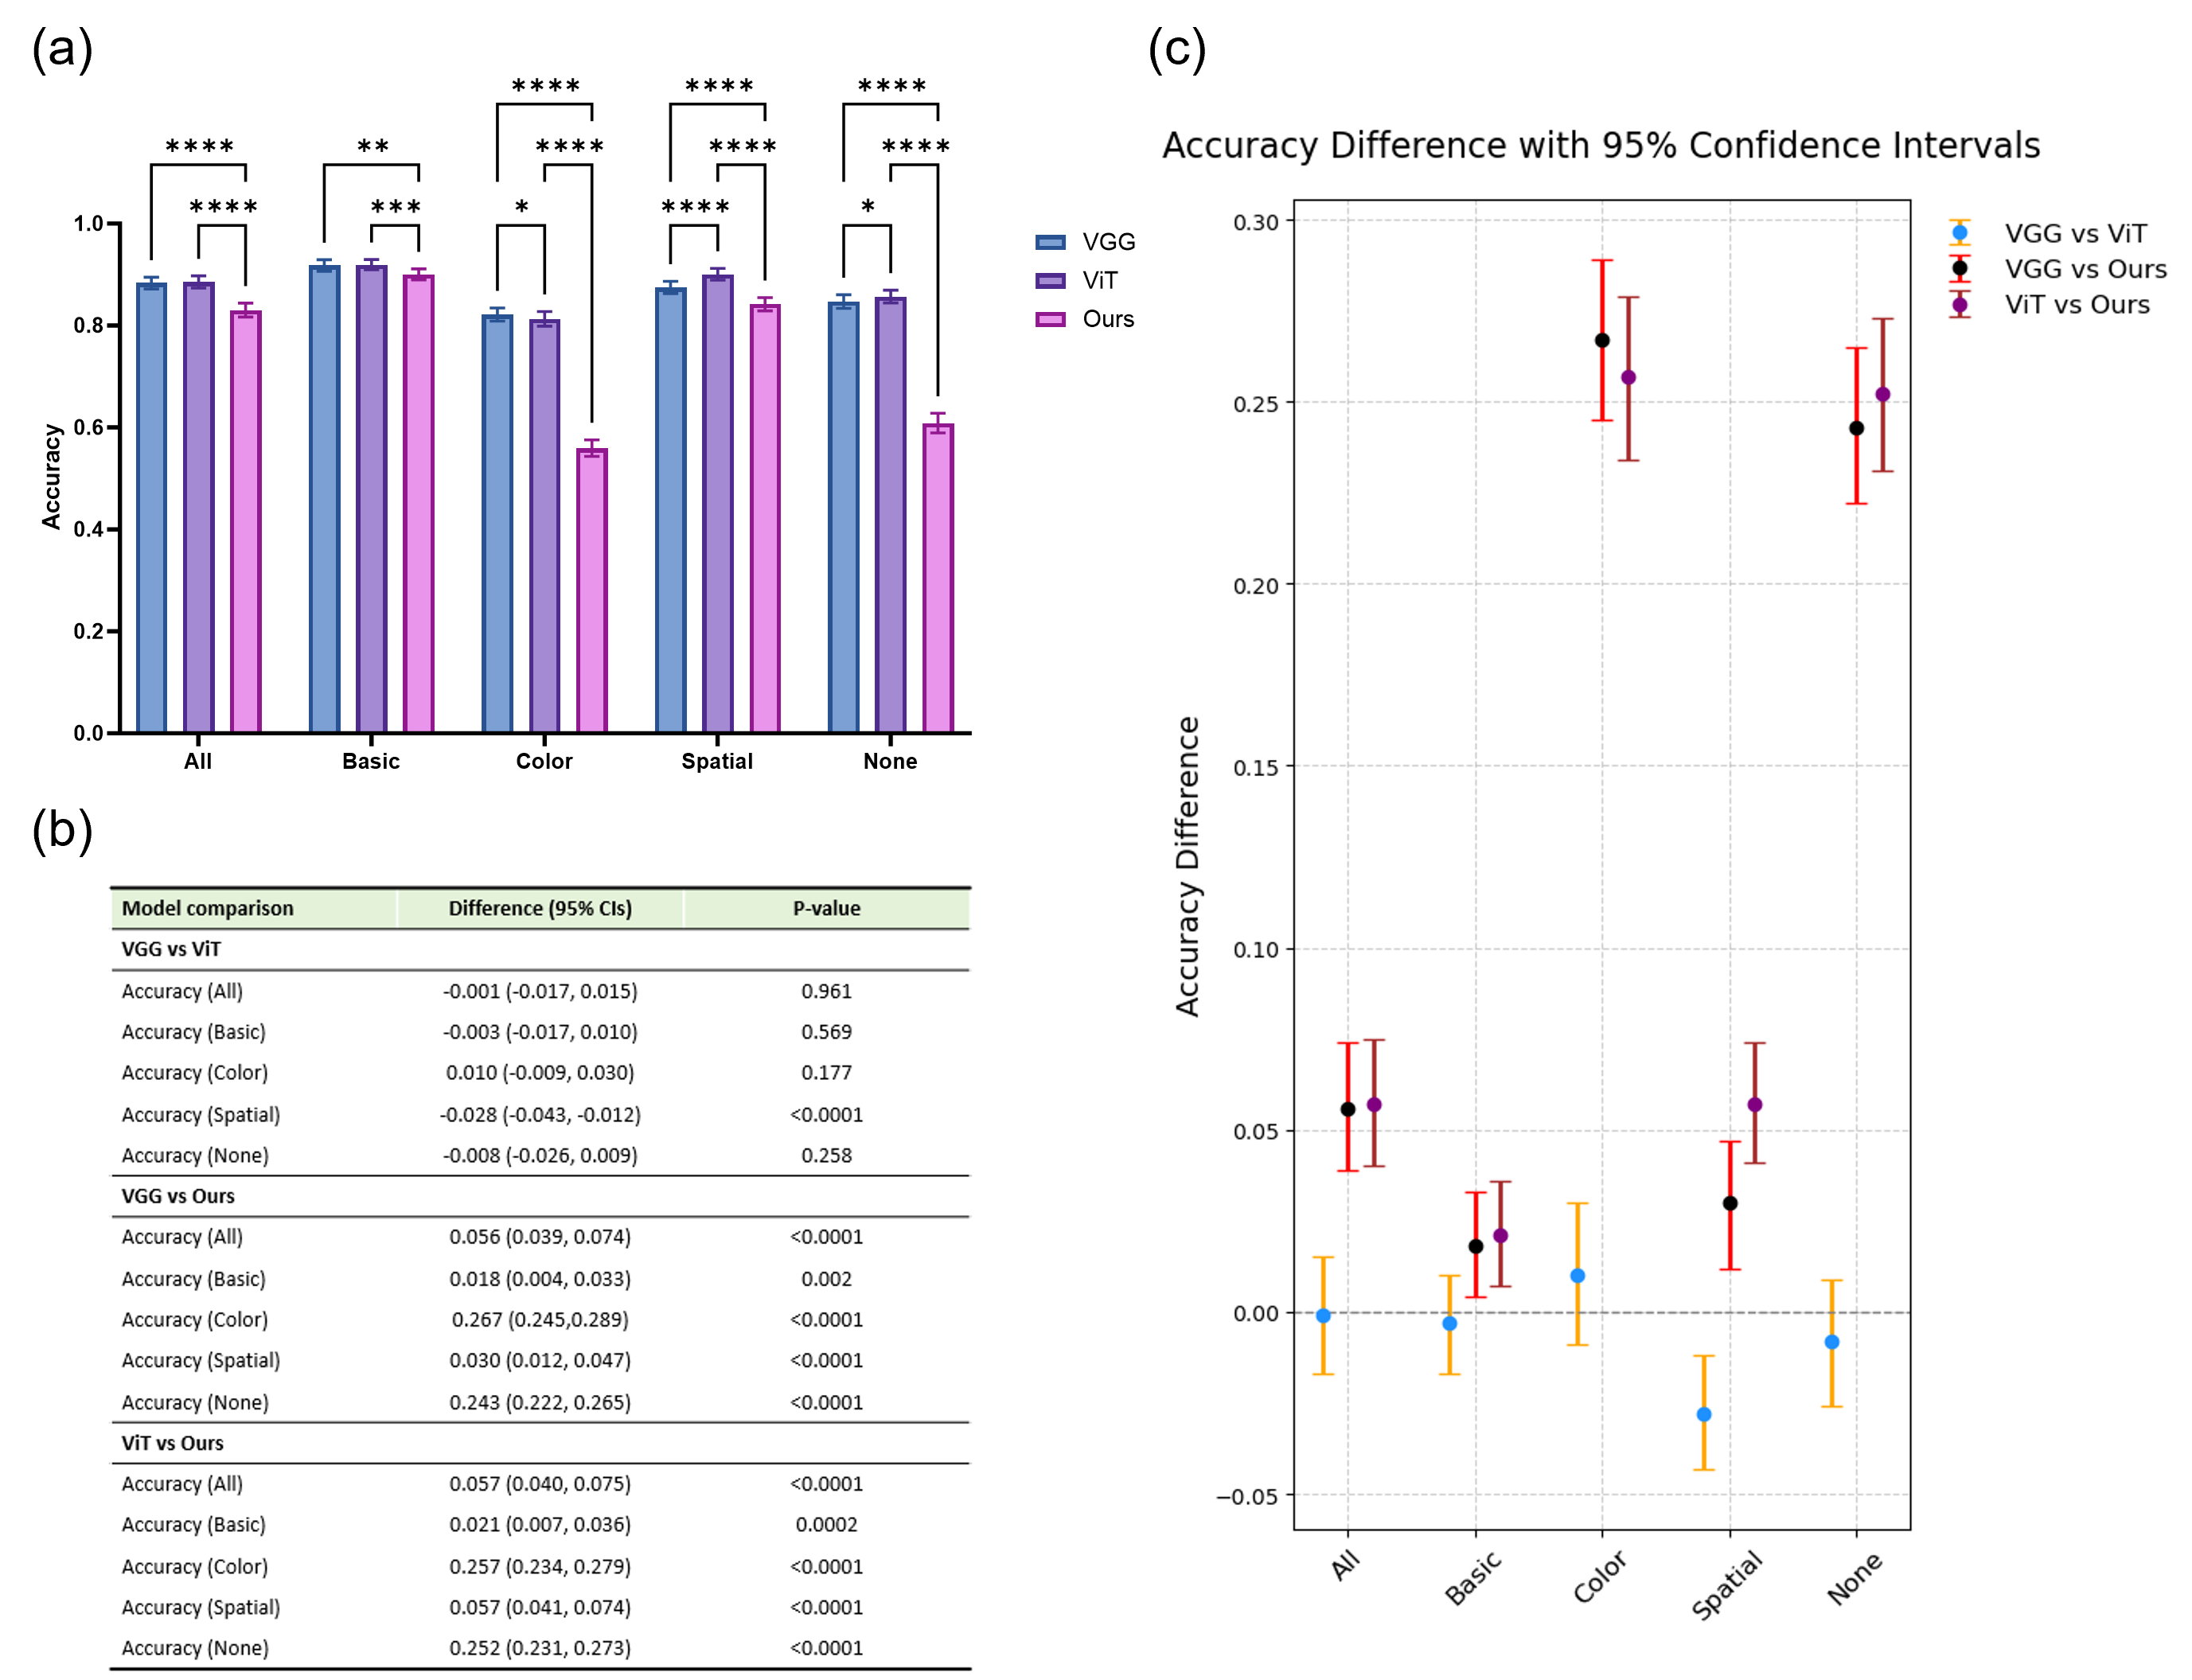


Supplementary figure 7. Comparison between our model and the pretrained baseline models. (a) Under various data augmentation methods, the classification performance of our model is consistently and significantly lower than that of other pre-trained baseline models. However, in Groups "Basic", "Spatial", and "All", the classification performance of our model is comparable to that of the baseline models. Statistical significance was evaluated using one-way ANOVA. (b) The McNemar’s Chi-squared test results of pretrained baseline models and our model. Confidence intervals for the accuracy metrics were calculated using the normal approximation method. (c) Graphical representation of the differences in classification accuracy between pretrained baseline models and our model.


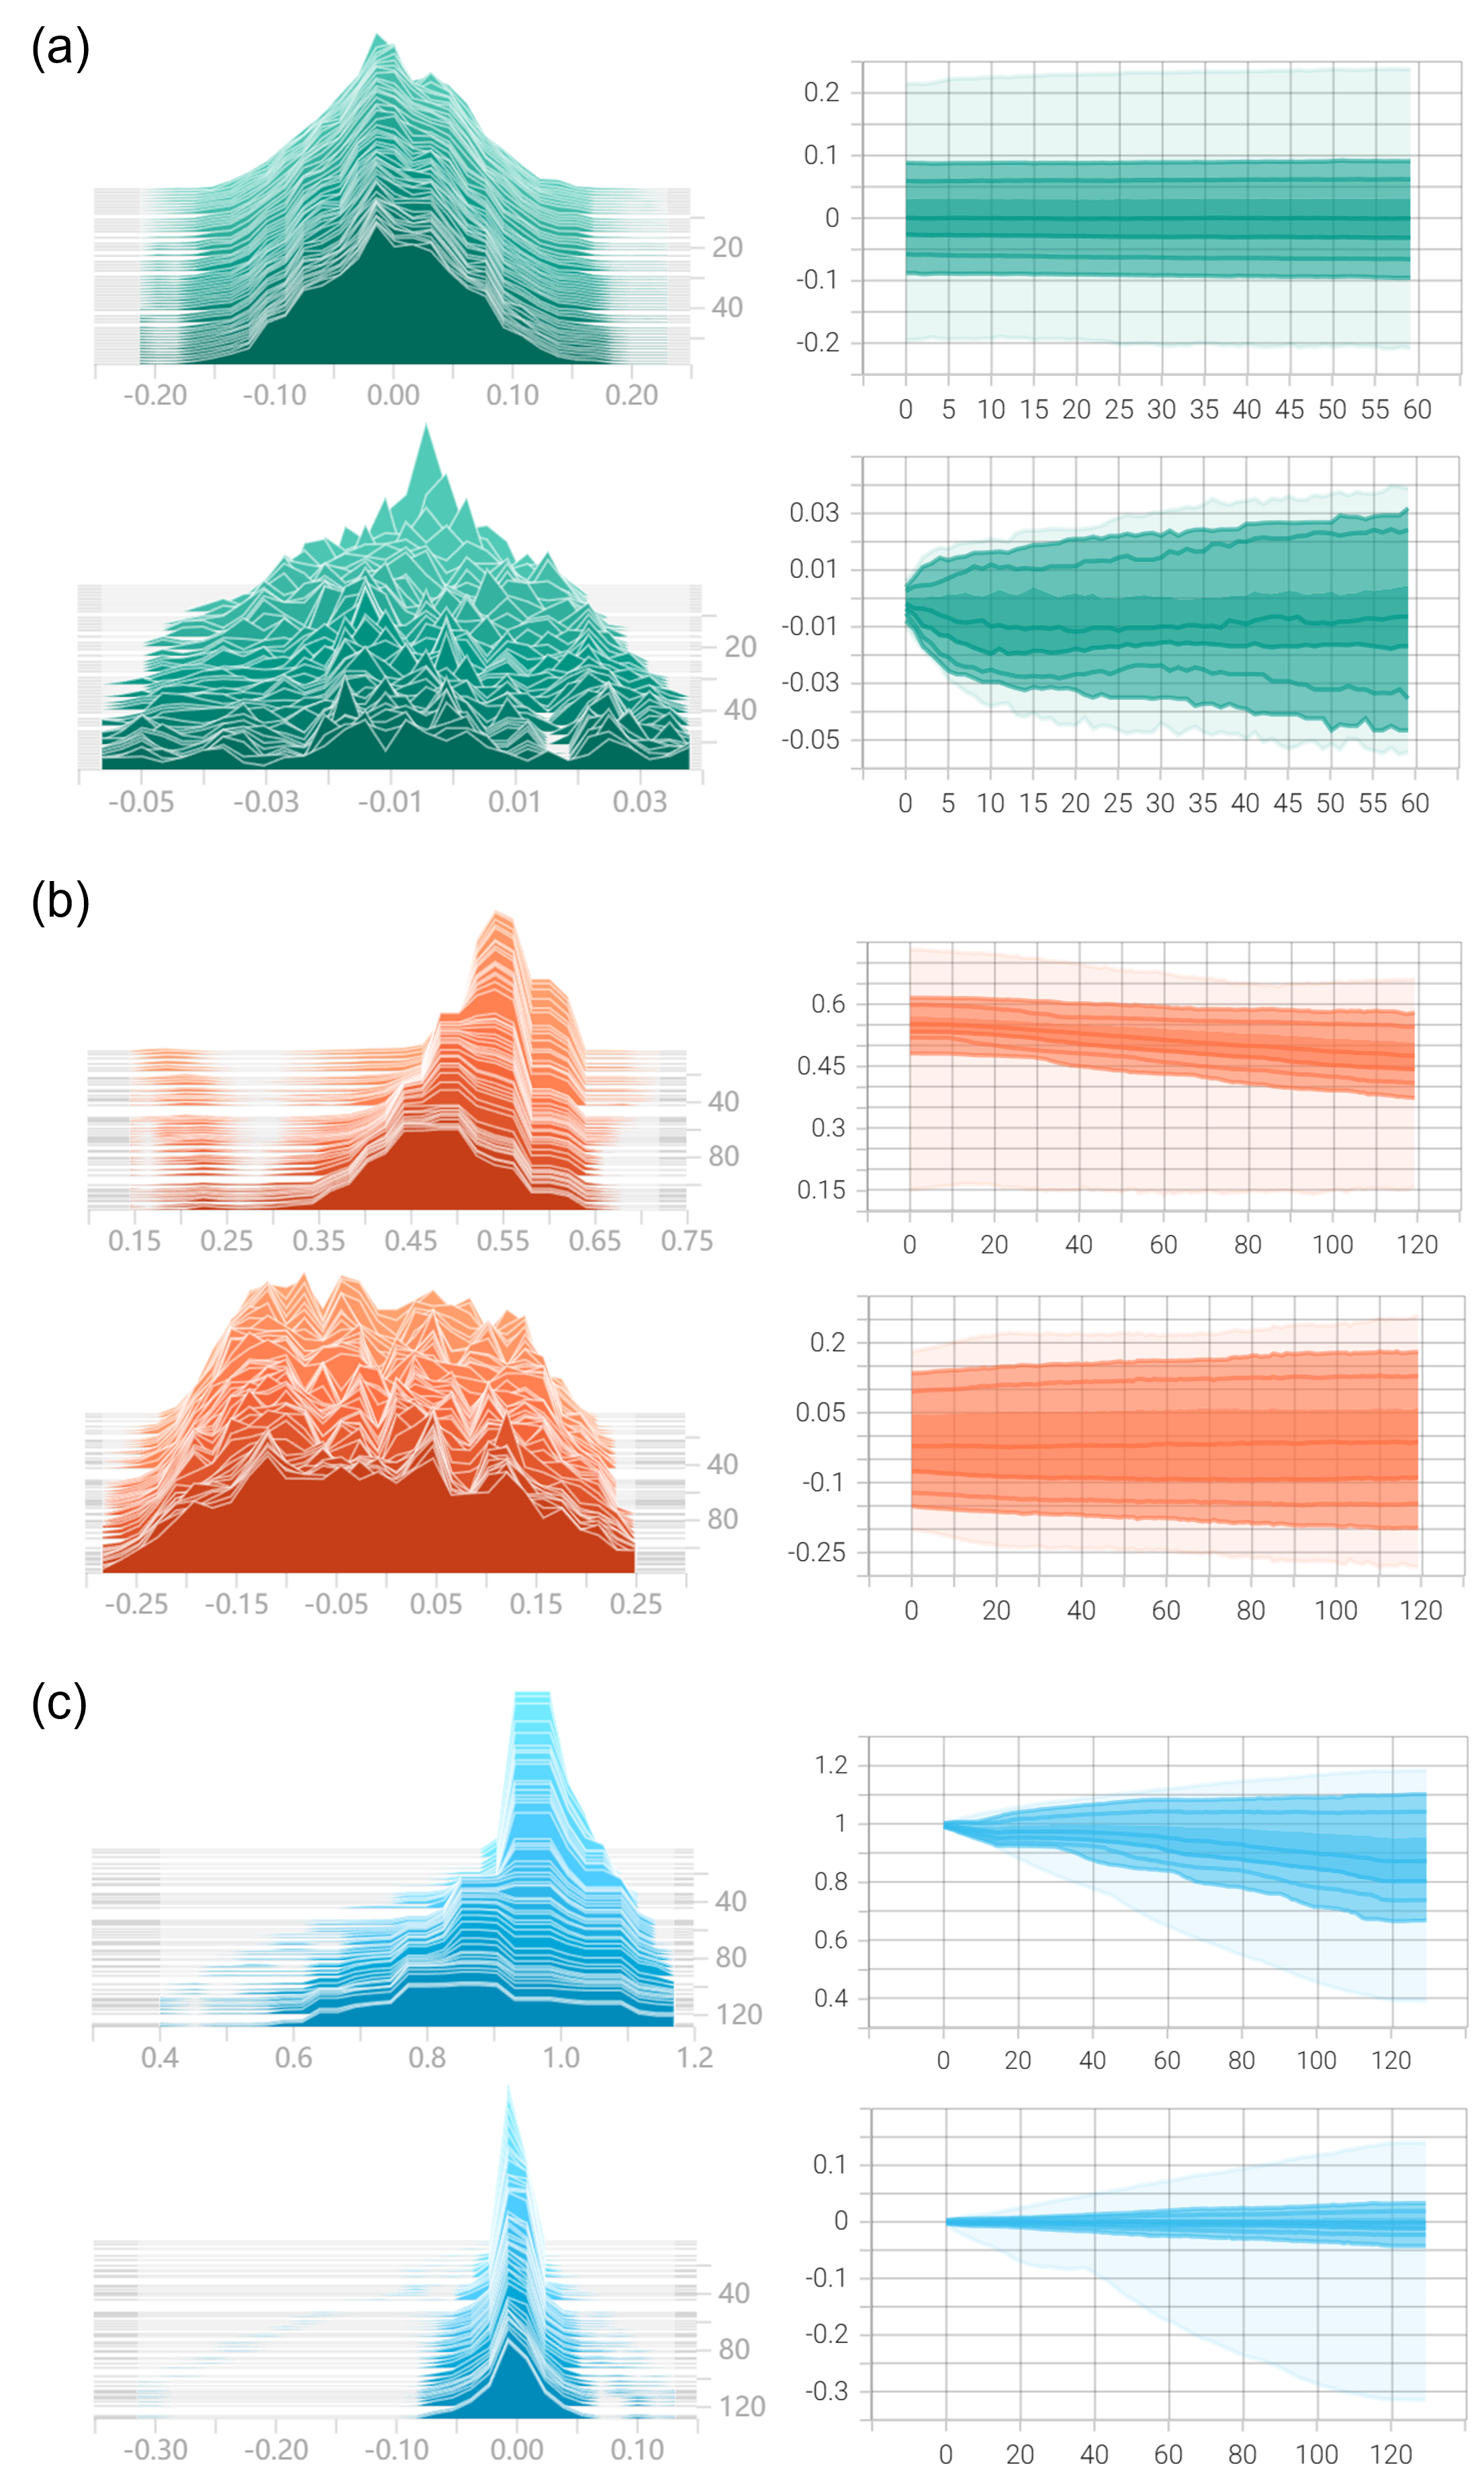


Supplementary figure 8. The evolution of the distribution of weights and biases in specific layers of different models throughout the training process. It provides a visual representation of how these parameters adapt and change as the models learn from the data, offering insights into the learning dynamics and potential convergence behavior of the models. The left-hand graph offers a vivid depiction of the variation in the shape of the parameter distribution, while the right-hand graph illustrates the trajectory of the parameter value changes. In each graph, the upper portion signifies the evolution of the weights, and the lower portion corresponds to the shifts in the biases. The weights and biases of each model are derived from the final normalization layer within the feature extraction module of their respective architectures. Both the VGG and ViT feature extraction modules are initialized with pre-trained weights. (a) VGG. During the fine-tuning process of the models, the distribution of weights exhibits only minimal changes, whereas the variations in biases are considerably pronounced. This observation serves as indirect evidence of the effectiveness of the pre-trained weights. (b) ViT. During the fine-tuning process of the models, a notable alteration in the distribution of weights is observed, accompanied by significant changes in the biases as well. (c) Ours. Following stochastic initialization of the models, a significant transformation in the distribution of weights is discernible throughout the training phase, and the bias parameters also underwent notable alterations.


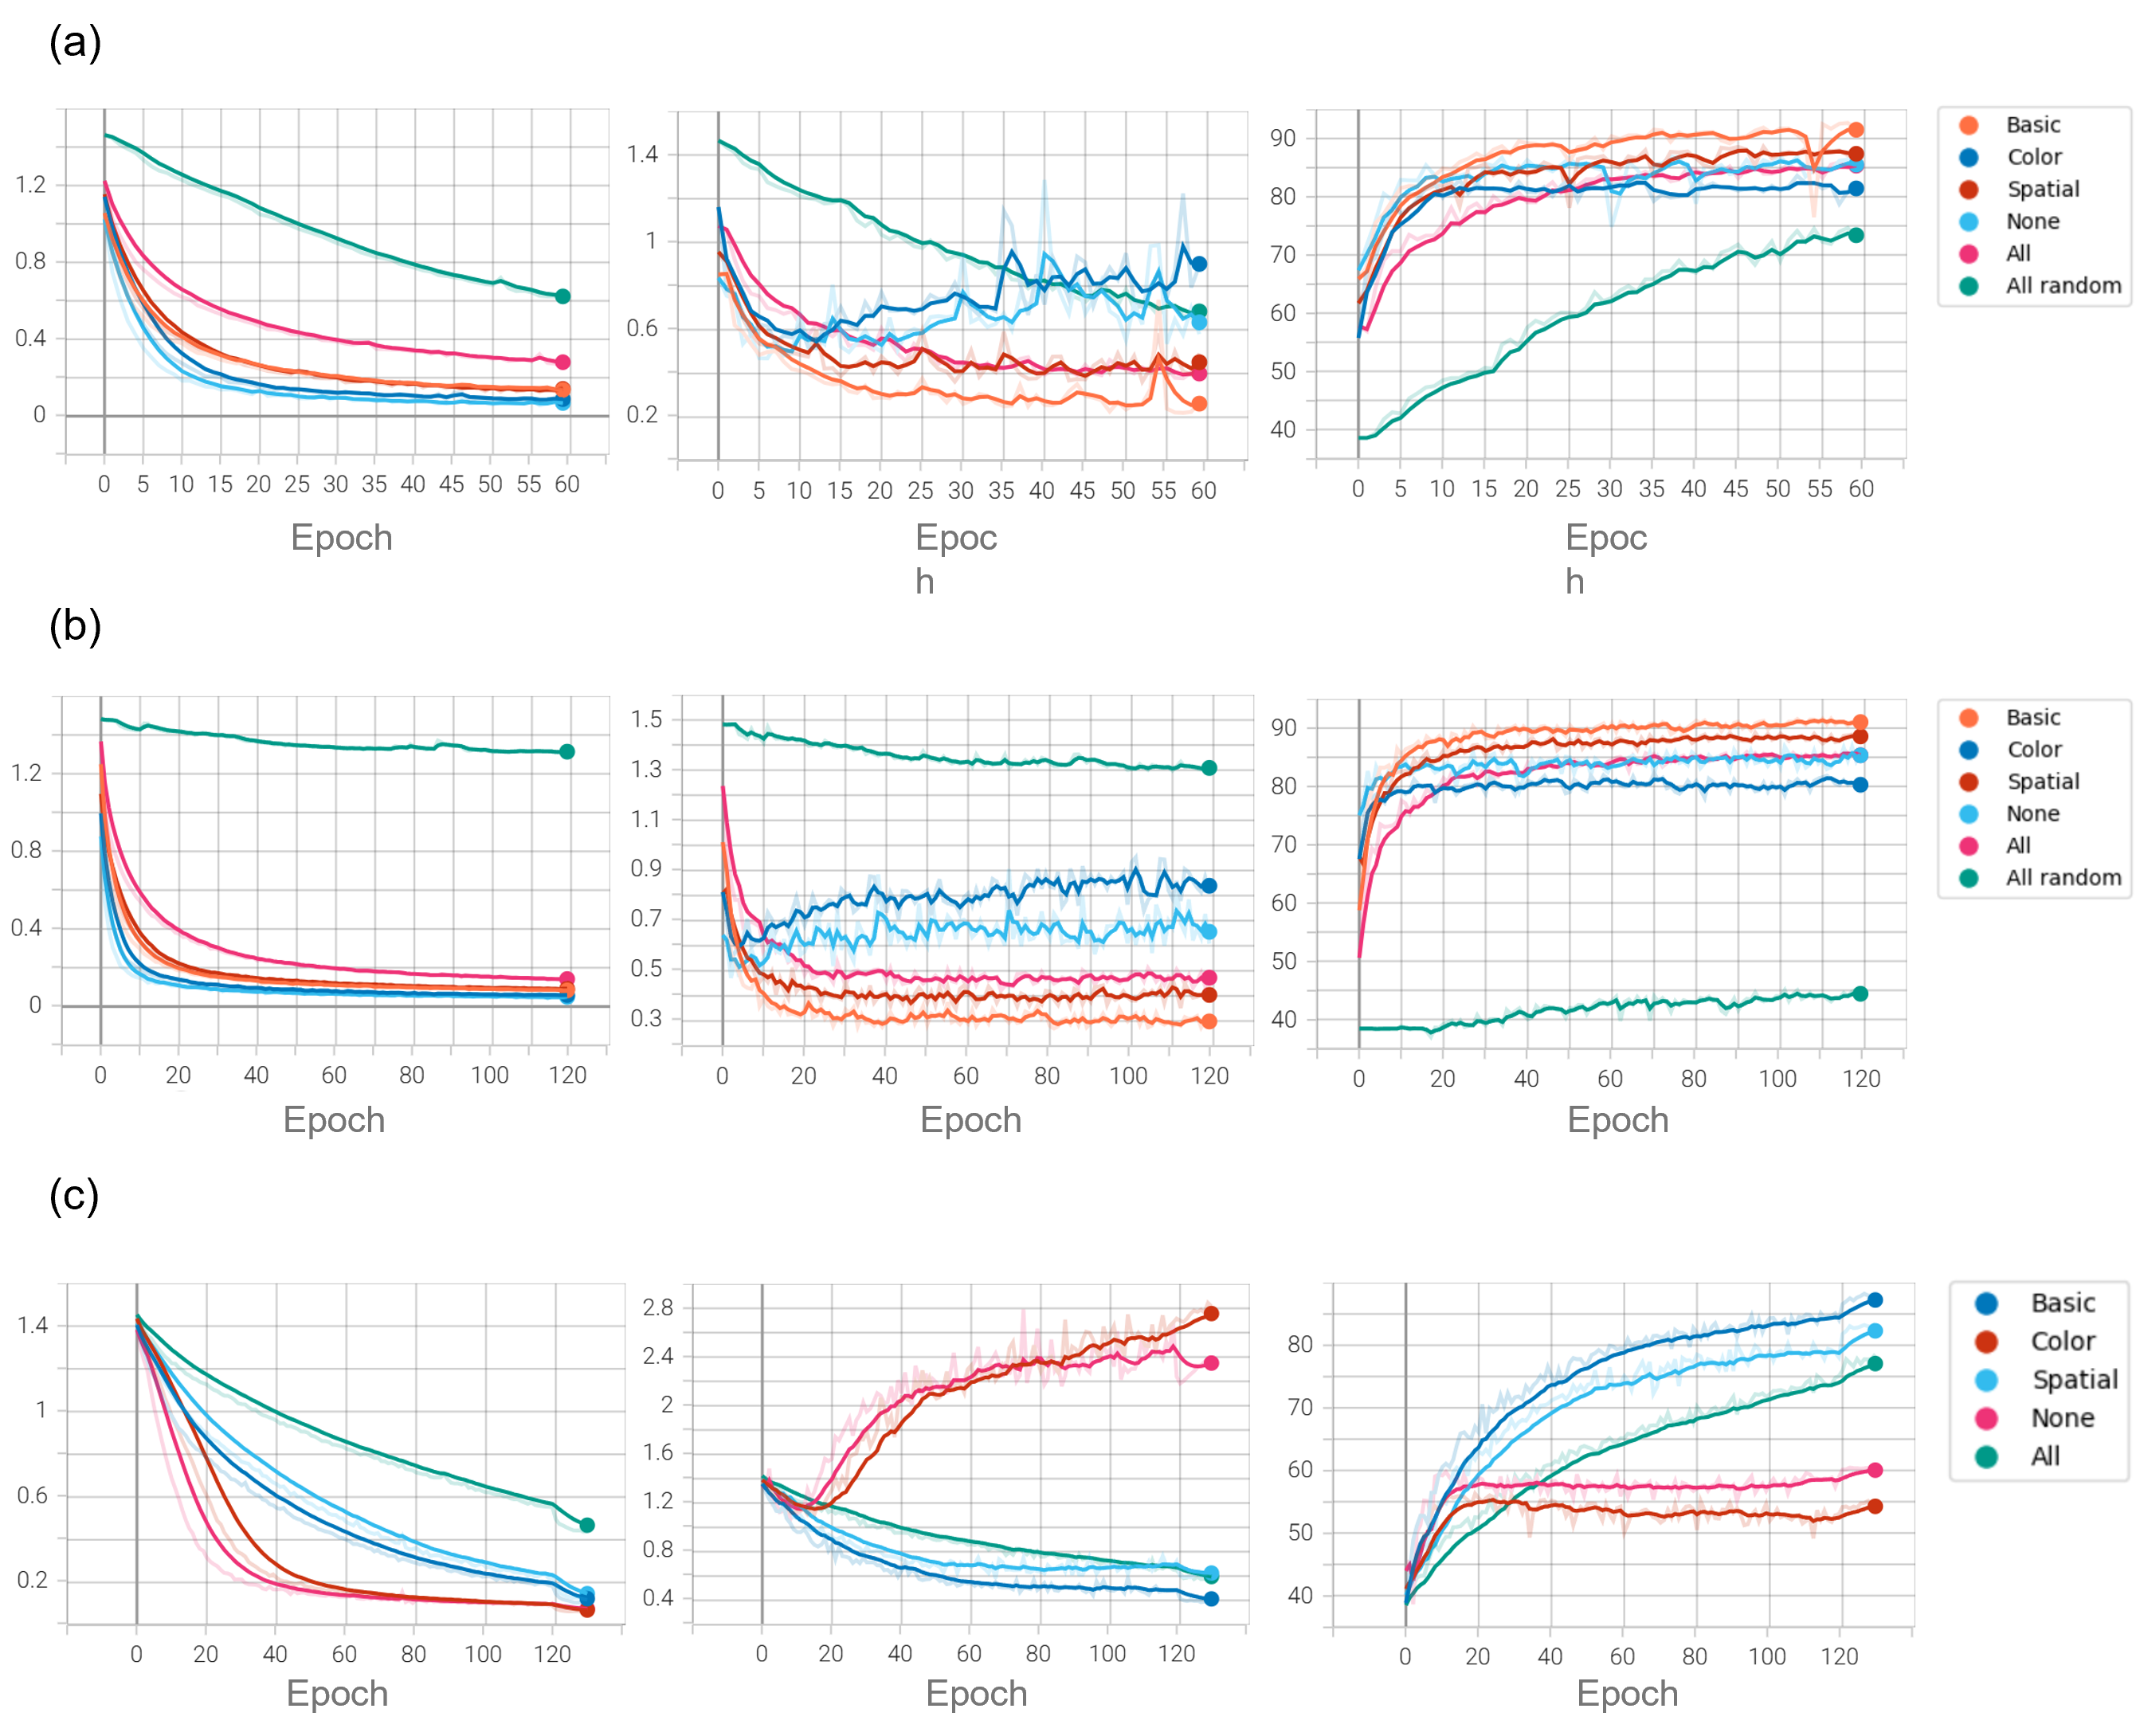


Supplementary figure 9. The dynamic training process of different models. The left panel illustrates the change in model loss during the training process, the middle panel depicts the change in model loss on the validation set, and the right panel shows the change in classification accuracy of the model on the validation set. (a) VGG. The left panel of the figure demonstrates that among all the groups, the model in Group "None" exhibits the most rapid decline in loss, while the model with random weight initialization shows the slowest decrease in loss. Furthermore, based on the model's performance on the validation set, it can be observed that the model in Groups "None" and "Color" experiences significant overfitting. (b) ViT. the model in Group "None" exhibits the most rapid decline in loss, while the model with random weight initialization demonstrates the slowest decrease in loss. Additionally, based on the model's performance on the validation set, it is evident that the model in Groups "None" and "Color" experiences significant overfitting. Furthermore, the model with random weight initialization shows extremely slow convergence. (c) Ours. Groups "None" and "Color" exhibits the most rapid decline in loss. Additionally, based on the model's performance on the validation set, it is evident that the model in Groups "None" and "Color" experiences significant overfitting. In contrast, the model in Groups "Basic" and "Spatial" demonstrates favorable training dynamics. Note: For baseline models, all models except for group "All random" were pretrained on the ImageNet dataset.


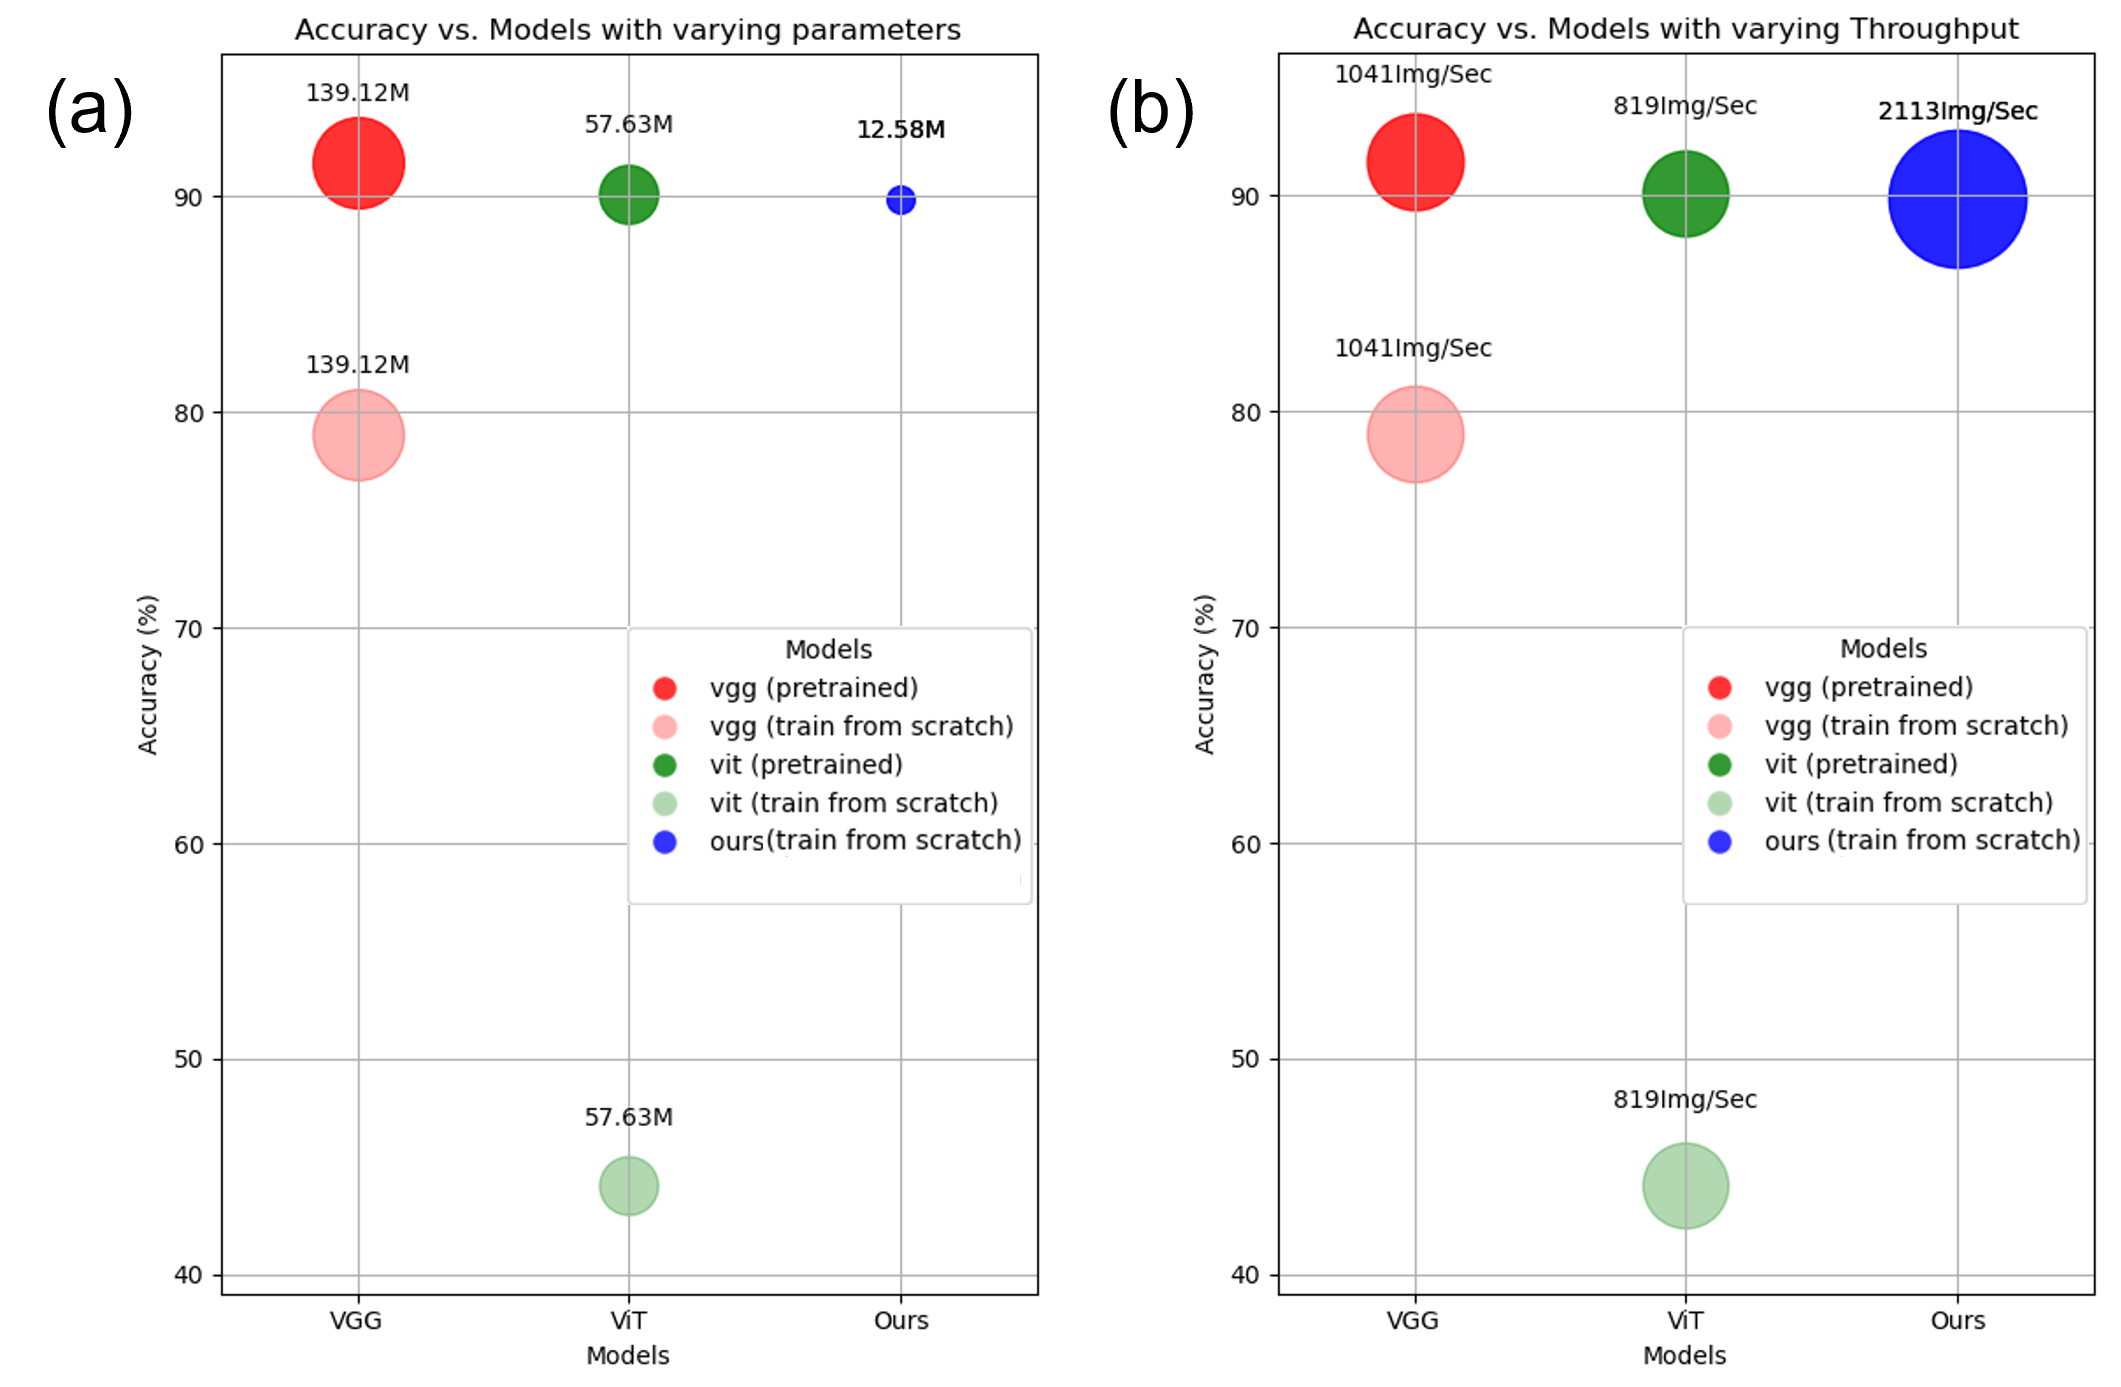


Supplementary figure 10. The relationship between the performance and parameter size of the model, as well as the speed of the model during inference. (a) Compared to the baseline model, our model achieves a comparable classification performance with a substantially smaller parameter size. (b) Compared to the baseline model, our model has a faster inference speed under other equal conditions.


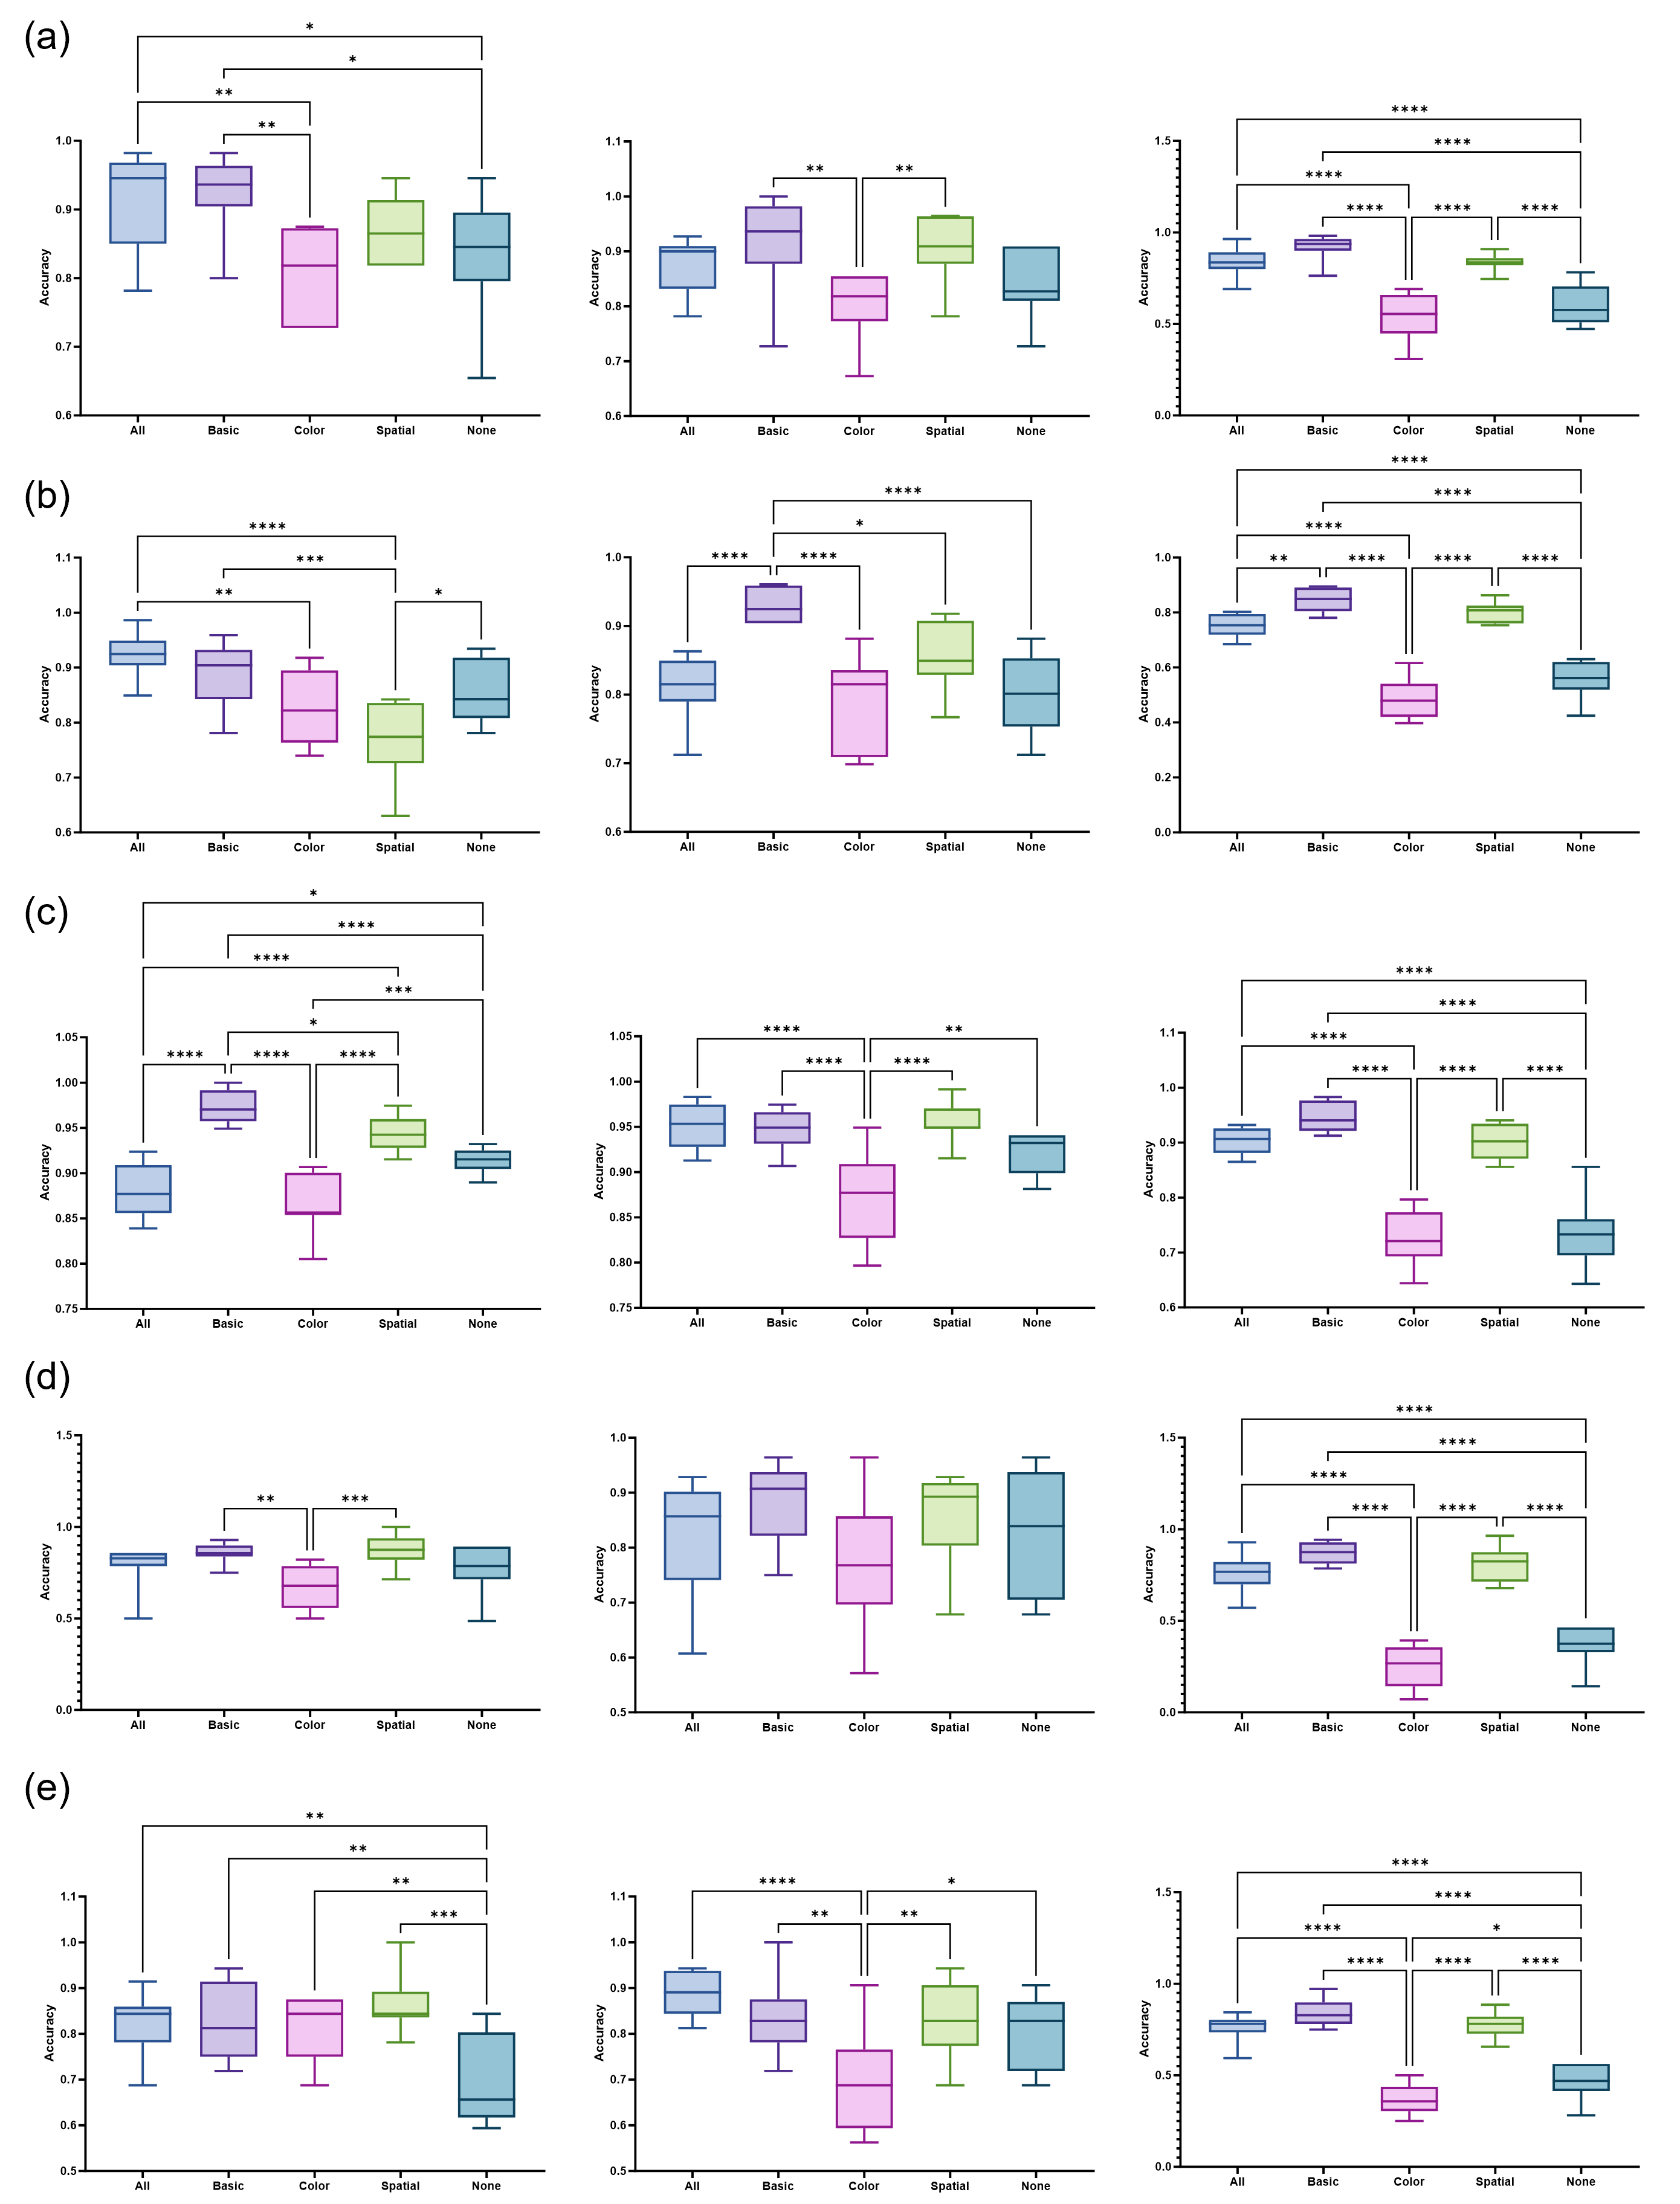


Supplementary figure 11. Comparison of the performance of different models under various data augmentation methods. The left panel represents VGG, the middle panel represents ViT, and the right panel represents our model. (a) Clear cell ovarian carcinoma. (b) Endometrioid ovarian carcinoma. (c) High-grade serous carcinoma. (d) Low-grade serous carcinoma. (e) Mucinous carcinoma. To ensure the statistical reliability and validity of the results, the test set is randomly divided into 10 subsets using a random sampling method. The accuracy of each model on each subset is calculated separately. The accuracy data of each model on different subsets is then aggregated to form the accuracy set for each model. Subsequently, a one-way ANOVA is employed to conduct a statistical test on the accuracy data of different models. This is done to assess whether there are significant differences in the accuracy among the models, thereby providing a rigorous statistical basis for the comparison and analysis of model performance.

Note：“All” denotes “Combined transformation Augmentation”; “Basic” means “Geometric transformation-only Augmentation”; “Color” indicates “Color transformation-only Augmentation”; “Spatial” stands “Spatial transformation-only Augmentation”; “None” represents “No augmentation Baseline”. Significant differences were assessed via one-way ANOVA.
